# Supplementary material for: Whole-genome sequencing of Oryza brachyantha reveals mechanisms underlying Oryza genome evolution
Source: PubMed Central journal article supplement — Nat Commun. 2013 Mar 12;4:1595–. doi: 10.1038/ncomms2596 (PMC3615480; doi:10.1038/ncomms2596), 2013-03-12
Supplement: ncomms2596-s1.pdf [file ncomms2596-s1.pdf]

# Supplementary Information

## Whole Genome Sequencing of *Oryza brachyantha* Reveals

### Mechanisms Underlying *Oryza* Genome Evolution

Jinfeng Chen<sup>1</sup>, Quanfei Huang<sup>2</sup>, Dongying Gao<sup>3</sup>, Junyi Wang<sup>2</sup>, Yongshan Lang<sup>2</sup>, Tieyan Liu<sup>1</sup>, Bo Li<sup>1</sup>, Jose Luis Goicoechea<sup>4</sup>, Chengzhi Liang<sup>1</sup>, Chengbin Chen<sup>5</sup>, Wenli Zhang<sup>6</sup>, Shouhong Sun<sup>1</sup>, Yi Liao<sup>1</sup>, Zetao Bai<sup>1</sup>, Xuemei Zhang<sup>1</sup>, Lu Yang<sup>1</sup>, Chengli Song<sup>1</sup>, Meijiao Wang<sup>1</sup>, Jinfeng Shi<sup>1</sup>, Geng Liu<sup>2</sup>, Junjie Liu<sup>2</sup>, Heling Zhou<sup>2</sup>, Weili Zhou<sup>2</sup>, Qiulin Yu<sup>2</sup>, Na An<sup>2</sup>, Yan Chen<sup>2</sup>, Qingle Cai<sup>2</sup>, Bo Wang<sup>2</sup>, Binhang Liu<sup>2</sup>, Jiumeng Min<sup>2</sup>, Ying Huang<sup>2</sup>, Honglong Wu<sup>2</sup>, Zhenyu Li<sup>2</sup>, Yong Zhang<sup>2</sup>, Ye Yin<sup>2</sup>, Wenqin Song<sup>5</sup>, Jiming Jiang<sup>6</sup>, Scott A. Jackson<sup>3</sup>, Rod A. Wing<sup>4</sup>, Jun Wang<sup>2</sup> & Mingsheng Chen<sup>1</sup>

<sup>1</sup>State Key Laboratory of Plant Genomics, Institute of Genetics and Developmental Biology, Chinese Academy of Sciences, Beijing 100101, China;

<sup>2</sup>BGI-Shenzhen, Shenzhen 518000, China;

<sup>3</sup>Institute of Plant Breeding, Genetics & Genomics, University of Georgia, Athens, GA 30602, USA;

<sup>4</sup>Arizona Genomics Institute, School of Plant Sciences, BIO5 Institute, University of Arizona, Tucson, Arizona 85721, USA;

<sup>5</sup>Department of Genetics and Cell Biology, Nankai University, Tianjin 300071, China;

<sup>6</sup>Department of Horticulture, University of Wisconsin-Madison, Madison, WI 53706, USA;

Correspondence and requests for materials should be addressed to M.-S.C. (mschen@genetics.ac.cn), or to J.W. ( wangj@genomics.org.cn), or to R.A.W. (rwing@Ag.arizona.edu).

# Table of content

|                                                                                                                                                                                            |          |
|--------------------------------------------------------------------------------------------------------------------------------------------------------------------------------------------|----------|
| <b>Supplementary Figures</b> .....                                                                                                                                                         | <b>5</b> |
| Supplementary Figure S1 Phylogenetic tree of diploid genome types in the genus <i>Oryza</i> <sup>61</sup> . .....                                                                          | 5        |
| Supplementary Figure S2 Karyotyping pachytene chromosomes of <i>O. brachyantha</i> . .....                                                                                                 | 6        |
| Supplementary Figure S3 Anchoring sequence blocks onto chromosomes of <i>O. brachyantha</i> ...7                                                                                           | 7        |
| Supplementary Figure S4 Comparisons of genomic features between <i>O. brachyantha</i> (down) and <i>O. sativa</i> (up).....                                                                | 8        |
| Supplementary Figure S5 Comparison of genome alignments between <i>O. brachyantha</i> and <i>O. sativa</i> .....                                                                           | 9        |
| Supplementary Figure S6 Influence of introns and intergenic regions to genome size variation. ....                                                                                         | 10       |
| Supplementary Figure S7 Comparisons of chromosome distribution of NBS-LRR genes between <i>O. brachyantha</i> and <i>O. sativa</i> . .....                                                 | 11       |
| Supplementary Figure S8 Examples of NBS-LRR type pseudogenes in <i>O. brachyantha</i> (up) and <i>O. sativa</i> (down).....                                                                | 12       |
| Supplementary Figure S9 Comparisons of chromosomal distribution of RLK-LRR genes between <i>O. brachyantha</i> and <i>O. sativa</i> . .....                                                | 13       |
| Supplementary Figure S10 Examples of RLK-LRR type pseudogenes in <i>O. brachyantha</i> (up) and <i>O. sativa</i> (down).....                                                               | 14       |
| Supplementary Figure S11 Distribution of inversions between <i>O. brachyantha</i> and <i>O. sativa</i> . .....                                                                             | 15       |
| Supplementary Figure S12 The structure variations (inversions) in <i>O. brachyantha</i> supported by paired-end mapping and read depth. ....                                               | 16       |
| Supplementary Figure S13 Gene duplications associated with inversions in <i>O. sativa</i> . .....                                                                                          | 17       |
| Supplementary Figure S14 Pseudogenization of the parent gene of the inversion-associated duplicated gene in <i>O. sativa</i> . .....                                                       | 18       |
| Supplementary Figure S15 Fold enrichment of non-collinear genes in <i>O. sativa</i> .....                                                                                                  | 19       |
| Supplementary Figure S16 Synteny along the chromosomes between <i>O. brachyantha</i> and <i>O. sativa</i> .....                                                                            | 20       |
| Supplementary Figure S17 Breakpoint signatures of non-collinear genes formed by sequence duplications. ....                                                                                | 21       |
| Supplementary Figure S18 Breakpoint signatures of non-collinear genes formed by sequence duplications without identified donor sequences. ....                                             | 22       |
| Supplementary Figure S19 The distribution of sequence rearrangements and their size differences compared with collinear regions between <i>O. brachyantha</i> and <i>O. sativa</i> . ..... | 23       |
| Supplementary Figure S20 Comparative analysis of the H7 heterochromatic domains among <i>O. brachyantha</i> , <i>O. glaberrima</i> and <i>O. sativa</i> .....                              | 25       |
| Supplementary Figure S21 Comparative analysis of the H8 heterochromatic domains among <i>O. brachyantha</i> , <i>O. glaberrima</i> and <i>O. sativa</i> .....                              | 27       |
| Supplementary Figure S22 Comparative analysis of the H1 heterochromatic domains among <i>O. brachyantha</i> , <i>O. glaberrima</i> and <i>O. sativa</i> .....                              | 29       |

|                                                                                                                                                                                           |           |
|-------------------------------------------------------------------------------------------------------------------------------------------------------------------------------------------|-----------|
| Supplementary Figure S23 Validation of sequence assemblies which are inconsistent with the physical map. ....                                                                             | 30        |
| Supplementary Figure S24 Comparison of sequence assembly with BAC clones sequenced by Sanger technology. ....                                                                             | 31        |
| Supplementary Figure S25 The quality of the assembled sequence corresponding to chromosome 11 segmental duplication region (FQ378032) assessed by paired-end mapping and read depth. .... | 32        |
| Supplementary Figure S26 The quality of the assembled sequence corresponding to chromosome 12 segmental duplication region (FQ378033) assessed by paired-end mapping and read depth. .... | 33        |
| Supplementary Figure S27 GC content of 200 bp flanking sequence of small gaps ( $\leq 200$ bp). ....                                                                                      | 34        |
| <b>Supplementary Tables.....</b>                                                                                                                                                          | <b>35</b> |
| Supplementary Table S1 Libraries used for the sequence assembly .....                                                                                                                     | 35        |
| Supplementary Table S2 Summary on statistics of the sequence assembly .....                                                                                                               | 36        |
| Supplementary Table S3 Summary of the transposable elements in the <i>O. brachyantha</i> genome .....                                                                                     | 37        |
| Supplementary Table S4 Summary of the solo-LTR families in <i>O. brachyantha</i> and <i>O. sativa</i> .....                                                                               | 38        |
| Supplementary Table S5 Number of R-genes characterized in <i>O. brachyantha</i> and <i>O. sativa</i> .....                                                                                | 40        |
| Supplementary Table S6 Number of pseudogenes characterized in R-genes of <i>O. brachyantha</i> and <i>O. sativa</i> .....                                                                 | 41        |
| Supplementary Table S7 Number of RLK-LRR genes characterized in <i>O. brachyantha</i> and <i>O. sativa</i> .....                                                                          | 42        |
| Supplementary Table S8 Number of pseudogenes characterized in RLK-LRR genes of <i>O. brachyantha</i> and <i>O. sativa</i> .....                                                           | 43        |
| Supplementary Table S9 Functional enrichment of GO category in tandemly duplicated genes of <i>O. brachyantha</i> and <i>O. sativa</i> .....                                              | 44        |
| Supplementary Table S10 Expression divergence of inversion-associated duplicated genes ....                                                                                               | 45        |
| Supplementary Table S11 Identification of non-collinear genes in <i>O. sativa</i> and <i>O. brachyantha</i> .....                                                                         | 47        |
| Supplementary Table S12 Sequence signatures of breakpoints of duplicated sequence pairs ...                                                                                               | 48        |
| Supplementary Table S13 Sequence coverage evaluated by comparison with BAC clones sequenced by Sanger technology and Roche 454 .....                                                      | 52        |
| Supplementary Table S14 Evidences used in gene prediction .....                                                                                                                           | 53        |
| Supplementary Table S15 Exonerate parameters used in gene prediction .....                                                                                                                | 54        |
| Supplementary Table S16 Gene statistical data from selected grass species .....                                                                                                           | 55        |
| Supplementary Table S17 Comparison of the gene prediction with the published data .....                                                                                                   | 56        |
| Supplementary Table S18 Determination of orthologous genes in <i>O. brachyantha</i> for the collected genes of <i>O. sativa</i> .....                                                     | 58        |
| Supplementary Table S19 Orthologous genes not found by the automatic strategy .....                                                                                                       | 59        |
| <b>Supplementary Note.....</b>                                                                                                                                                            | <b>60</b> |

|                                                                                                       |           |
|-------------------------------------------------------------------------------------------------------|-----------|
| Supplementary Note 1. Divergence time between <i>O. brachyantha</i> and <i>O. sativa</i> (rice) ..... | 60        |
| <b>Supplementary Methods</b> .....                                                                    | <b>61</b> |
| The plant materials and background.....                                                               | 61        |
| Sequencing materials .....                                                                            | 61        |
| Genome size estimation of <i>O. brachyantha</i> .....                                                 | 61        |
| Genome sequencing and assembly .....                                                                  | 61        |
| Genome sequencing .....                                                                               | 61        |
| Genome assembly .....                                                                                 | 61        |
| Anchoring the scaffolds onto chromosomes .....                                                        | 62        |
| Evaluation of the accuracy of the sequence assembly .....                                             | 62        |
| Gene prediction and evaluation .....                                                                  | 62        |
| Evidence-based gene prediction.....                                                                   | 62        |
| Evaluation of completeness and accuracy of the gene sets .....                                        | 63        |
| Transposable element annotation .....                                                                 | 64        |
| LTR retrotransposons .....                                                                            | 64        |
| Non-LTR retrotransposons.....                                                                         | 64        |
| DNA transposons .....                                                                                 | 64        |
| Influence of sequence assembly on transposable element annotation and genome size evolution .....     | 65        |
| Resistance related gene family .....                                                                  | 65        |
| Characterize resistance gene families NBS-LRR and RLK-LRR .....                                       | 65        |
| Comparative analysis of resistance gene families NBS-LRR and RLK-LRR .....                            | 65        |
| RNA-seq transcriptome .....                                                                           | 66        |
| <b>Supplementary References</b> .....                                                                 | <b>67</b> |

## Supplementary Figures

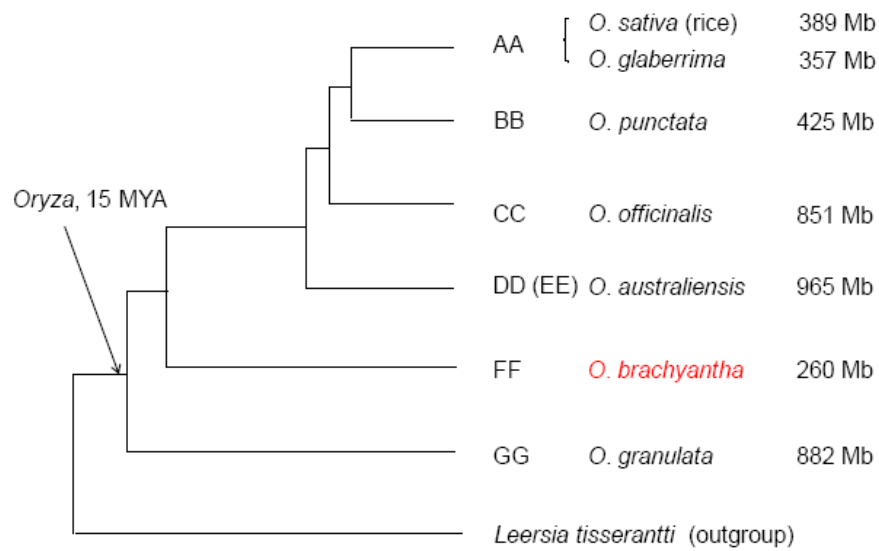

**Supplementary Figure S1 Phylogenetic tree of diploid genome types in the genus *Oryza*<sup>61</sup>.** The deepest split of *Oryza* species was estimated to be ~ 15 million years ago (MYA)<sup>62</sup>. Genome sizes were estimated by flow cytometry<sup>63</sup>; the genome sizes of *O. sativa* and *O. brachyantha* used the sizes of the genome sequence.

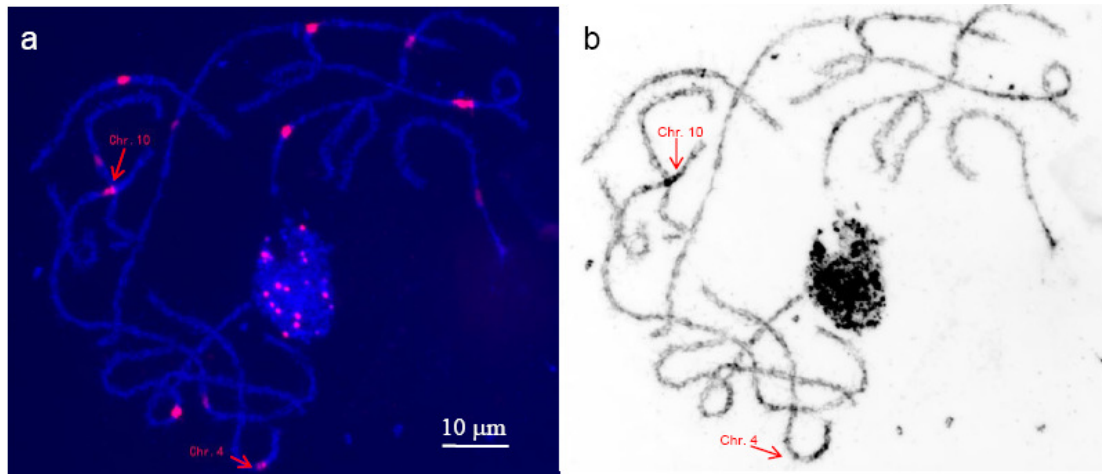

**Supplementary Figure S2 Karyotyping pachytene chromosomes of *O. brachyantha*.** (a), Chromosomes in the pachytene cell of *O. brachyantha* were hybridized with centromere-specific satellite repeat CentO-F<sup>64</sup> (red). The short arms and pericentromeric part of the long arms of chromosomes 4 and 10 are relatively condensed or relatively brighter after DAPI staining than the rest of the chromosomes. However, the differences between heterochromatin and euchromatin are not as distinct as observed in *O. sativa* ssp. *japonica* cv. Nipponbare<sup>65</sup>. *O. brachyantha* shows an overall lack of pericentromeric heterochromatin domains compared to Nipponbare<sup>65</sup>, consistent with its compact genome size. (b), DAPI stained chromosomes in Supplementary Figure S2a were converted into black-and-white image to enhance the visualization of euchromatin and heterochromatin on chromosomes. Bar, 10 µm.

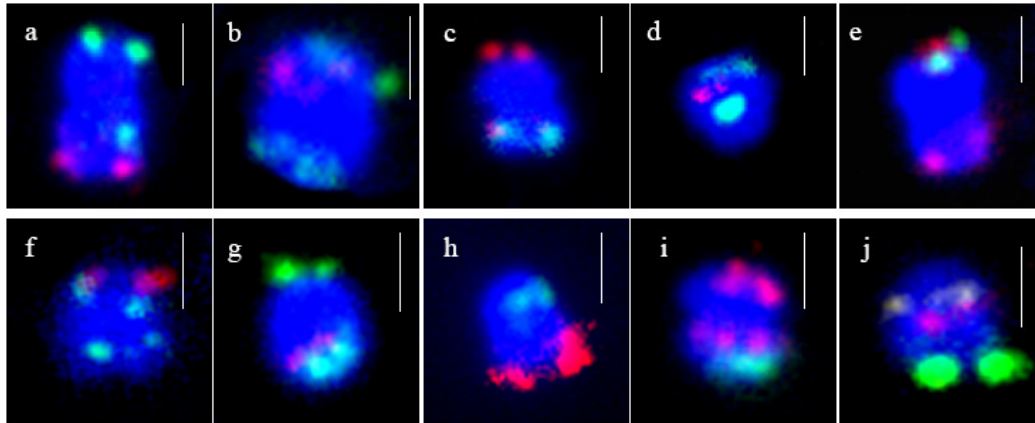

**Supplementary Figure S3 Anchoring sequence blocks onto chromosomes of *O. brachyantha*.**

Sequence blocks described in Figure 1 were anchored onto chromosomes by fluorescence in situ hybridization (FISH). Candidate BAC clones of the sequence blocks were used as probes to hybridize the somatic metaphase cells of *O. brachyantha*. Reference clones were developed for each chromosome in *O. brachyantha*, except for chromosome 6 and 9 due to experimental failure. BAC clones representing the sequence blocks were selected by integrating the sequence blocks with the physical map. The candidate clones should have BAC end sequences (BES) properly aligned to the sequence blocks, and have a lower proportion of repetitive sequences than the genome average (29%). All bars, 1  $\mu\text{m}$ .

(a), a0014B22 (block1, green-top), a0054K20 (block2, green-down), a0016F05 (chr01, red).

(b), a0054A06 (chr02, green-top), a0077H19 (block1, red), a0039G13 (block4, green-down).

(c), a0001K24 (block1, red-top), a0054J06 (block2, red-down), a0002D06 (chr03, green).

(d), a0027N15 (block1, green-top), a0056E10 (chr04, red), a0043D12 (block3, green-down).

(e), a0063E20 (chr05, red-top), a0044E01 (block1, red-down), a0044D12 (block3, green).

(f), a0039O02 (chr07, red), a0037L06 (block1, green-top), a0025B11 (block2, green-down).

(g), a0024A18 (block1, green-top), a0033B06 (chr08, red), a0040O15 (block2, green-down).

(h), a0027A23 (block1, green), a0090D06 (chr10, red).

(i), a0008N06 (block1, red-top), a0032H18 (chr11, red), a0074E19 (block3, green).

(j), a0071C04 (chr12, yellow), a0094I04 (block1, red), a0052P11 (block4, green).

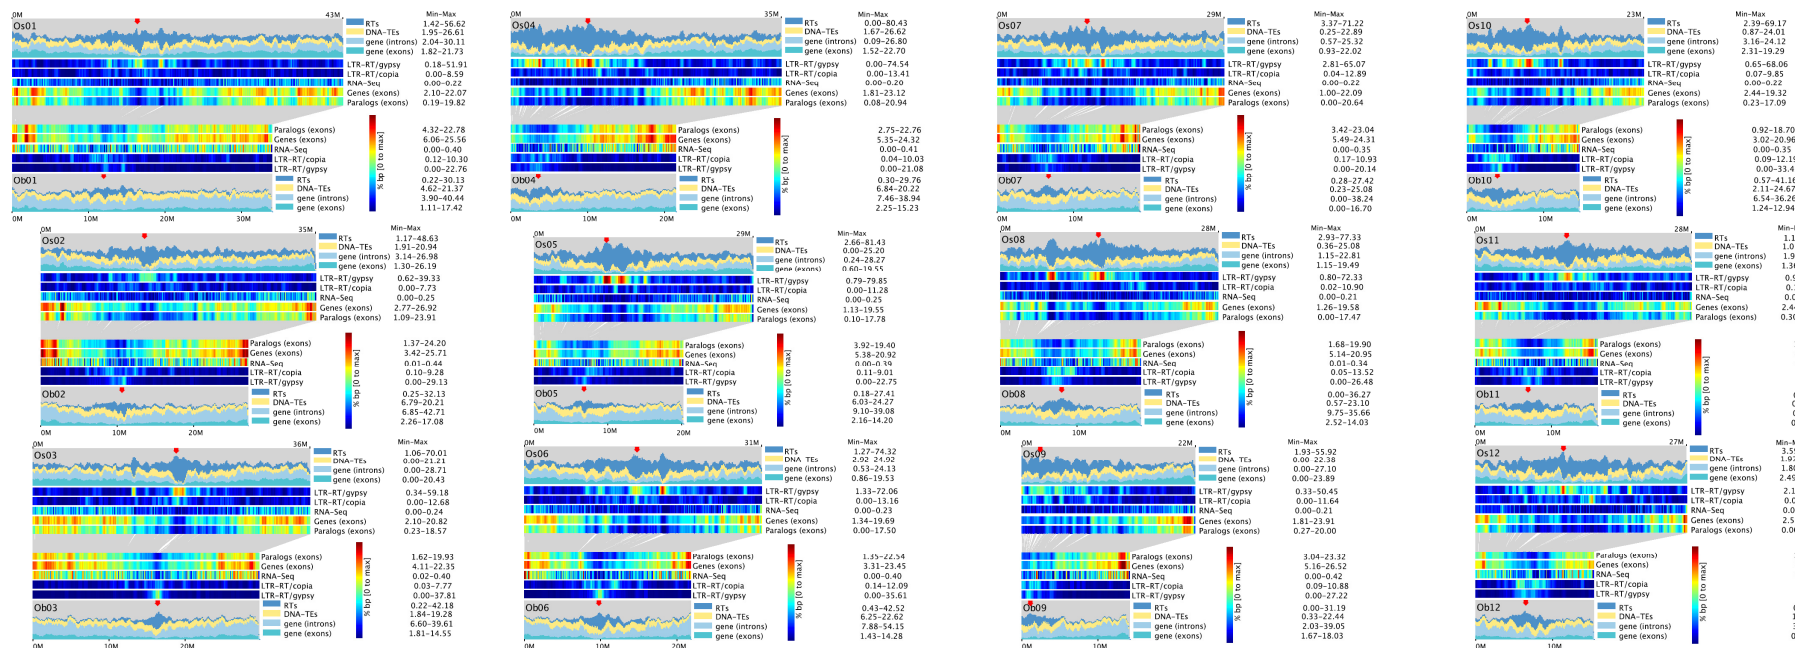

**Supplementary Figure S4 Comparisons of genomic features between *O. brachyantha* (down) and *O. sativa* (up).** The density of genomic features, including genes, transposable elements, RNA-Seq transcriptomes, were calculated for each 200 kb window. The stacked bar plots shows proportional distribution of retrotransposons (RTs), DNA-TEs (DNA transposons), introns and exons of genes. The heatmap tracks shows the distribution of *gypsy* and *copia* type LTR retrotransposons, RNA-Seq transcriptional level, all exons and exons with homologous sequence in the compared genome. The scale is different for each track, ranging from 0 to max value as indicated at the right of each chromosome. Centromeres are indicated by red arrows. Homologous exons between *O. brachyantha* and *O. sativa* are connected by gray lines. For all chromosomes, retrotransposons are concentrated at pericentromeric regions, whereas genes and DNA transposons are co-localized on chromosome arms. Exceptions were found on chromosome 4 and chromosome 10, which show a spread of a high proportion of retrotransposons along the short arms and the proximal regions of the long arms. The density of retrotransposons is much higher in *O. sativa* than *O. brachyantha*, largely due to the high proportion of *gypsy* type retrotransposons in *O. sativa*. These highly repetitive regions show low levels of transcription and homologous exons between the genomes of *O. brachyantha* and *O. sativa*.



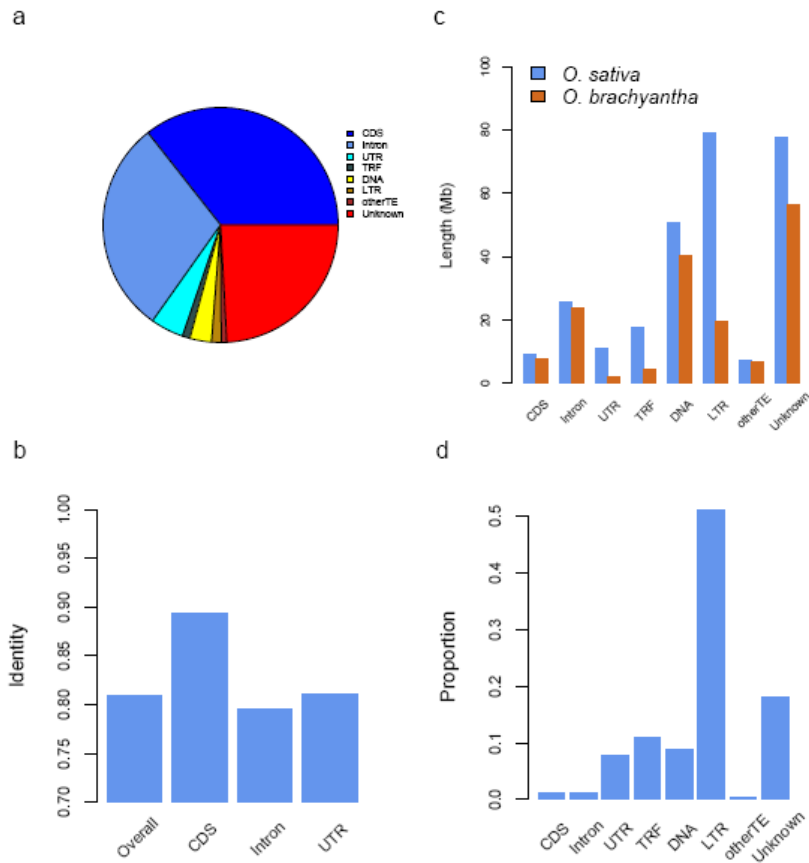

**Supplementary Figure S5 Comparison of genome alignments between *O. brachyantha* and *O. sativa*.** The genome sequences of *O. brachyantha* and *O. sativa* were aligned by LASTZ as described in Method. Gene and repeat annotations of *O. brachyantha* were used to calculate the distributions of genomic features in the alignable sequences. Most of the alignable sequences are consisted of coding sequences (CDS, 35%), introns (29%), unknown sequences (Unknown, 24%) and untranslated regions (UTR, 4%). The overall sequence identity between *O. brachyantha* and *O. sativa* is 80% with higher identity (89%) in CDS regions. The composition of unalignable sequences is different between *O. brachyantha* and *O. sativa*. Unknown sequences (35%) and DNA transposons (25%) are the most abundance unalignable sequences of *O. brachyantha*, whereas Unknown sequences (28%) and LTR retrotransposons (28%) are dominant in *O. sativa*. In total, the unalignable sequences contribute ~ 116 Mb sequence difference between *O. brachyantha* and *O. sativa*, in which LTR retrotransposons account for ~ 60 Mb. (a), Distribution of genomic component in the alignable sequences. (b), Sequence identity comparisons among genomic components. (c), Length distribution of genomic components in the unalignable sequences. (d), Contribution of genomic components to genome size variation between *O. brachyantha* and *O. sativa*.

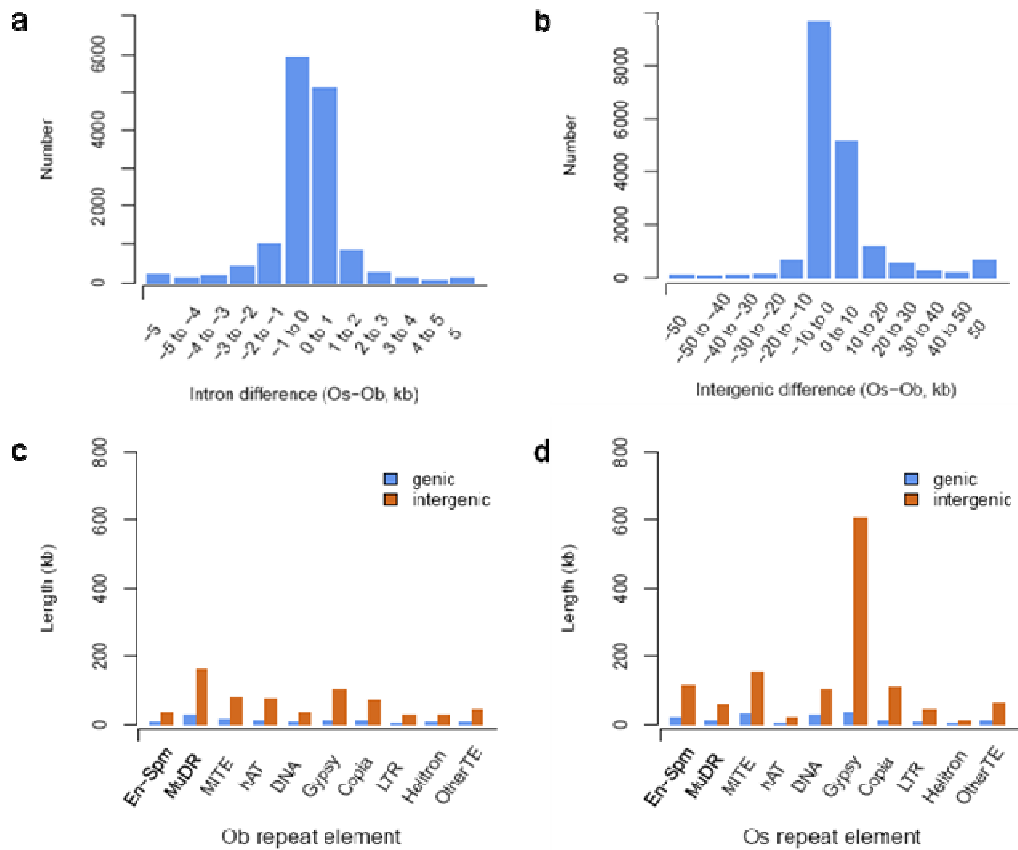

**Supplementary Figure S6 Influence of introns and intergenic regions to genome size variation.** (a). Differences on intron size of orthologous genes between *O. brachyantha* and *O. sativa*; (b). Differences on the size of orthologous intergenic regions between *O. brachyantha* and *O. sativa*; (c). Length of transposable elements located in genic and intergenic regions of *O. brachyantha*; (d). Length of transposable elements located in genic and intergenic regions of *O. sativa*.

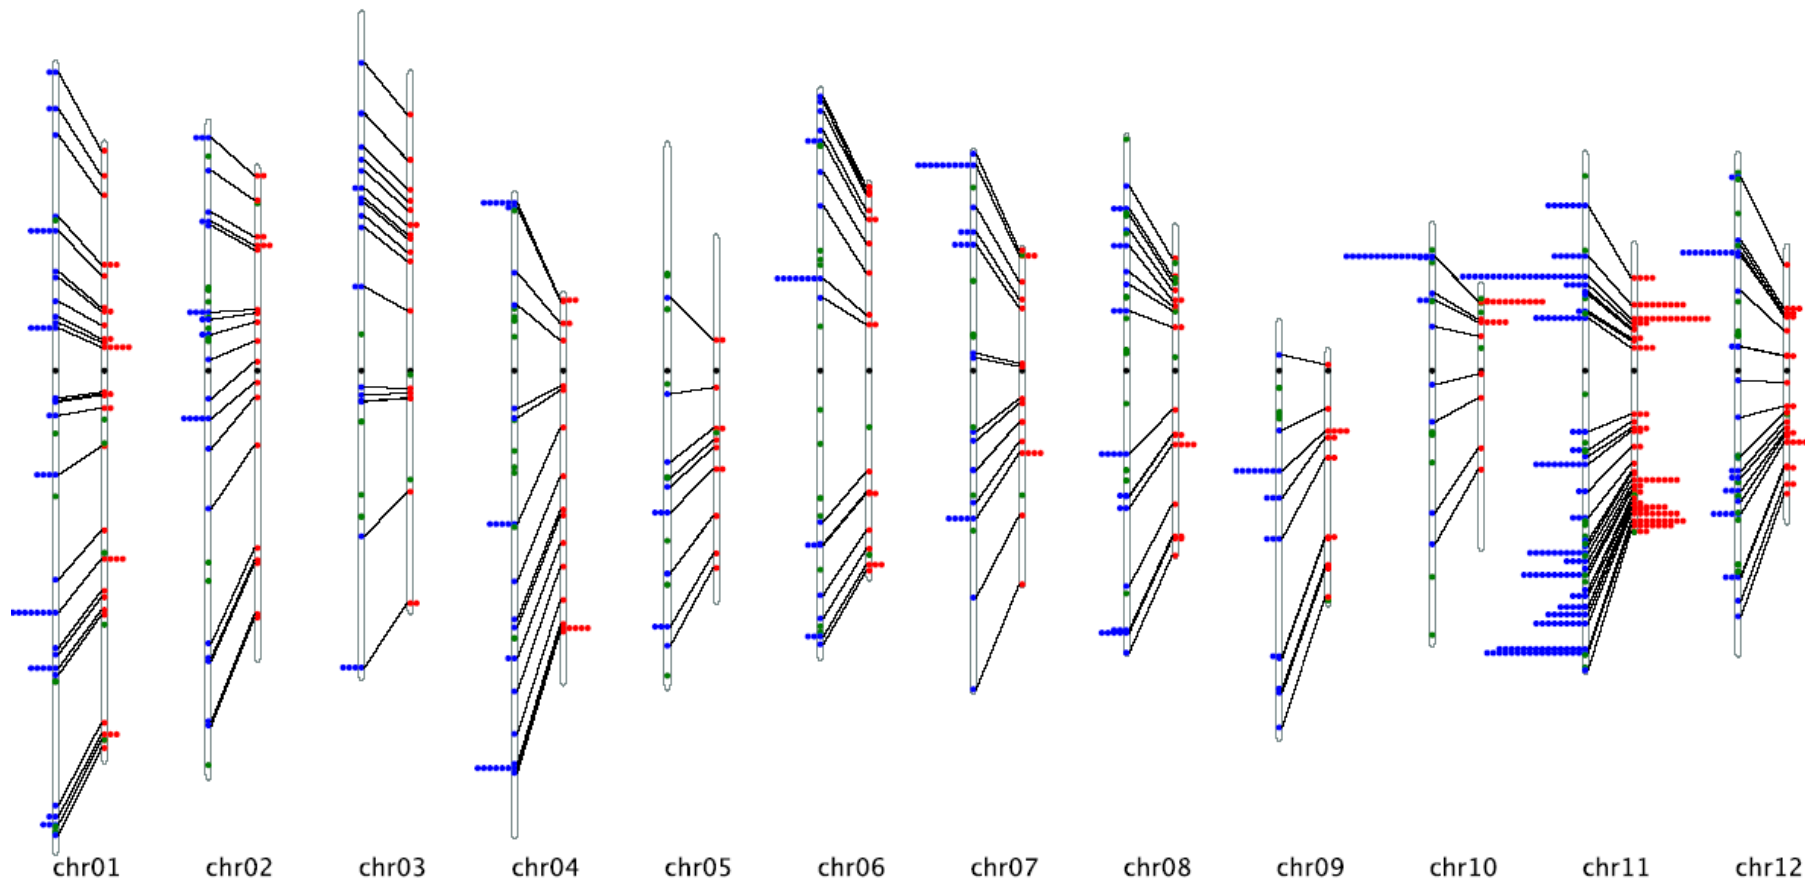

**Supplementary Figure S7 Comparisons of chromosome distribution of NBS-LRR genes between *O. brachyantha* and *O. sativa*.** For each chromosome pair, the left one represents the chromosome of *O. sativa* and the right one represents the chromosome of *O. brachyantha*. Centromeres are indicated by solid black circles. Genes are indicated by colored circles; Tandemly duplicated genes are clustered to one representative position; Blue circles stand for genes of *O. sativa*; Red circles stand for genes of *O. brachyantha*; Green circles stand for non-collinear genes; Orthologous genes or gene clusters are connected by black lines.

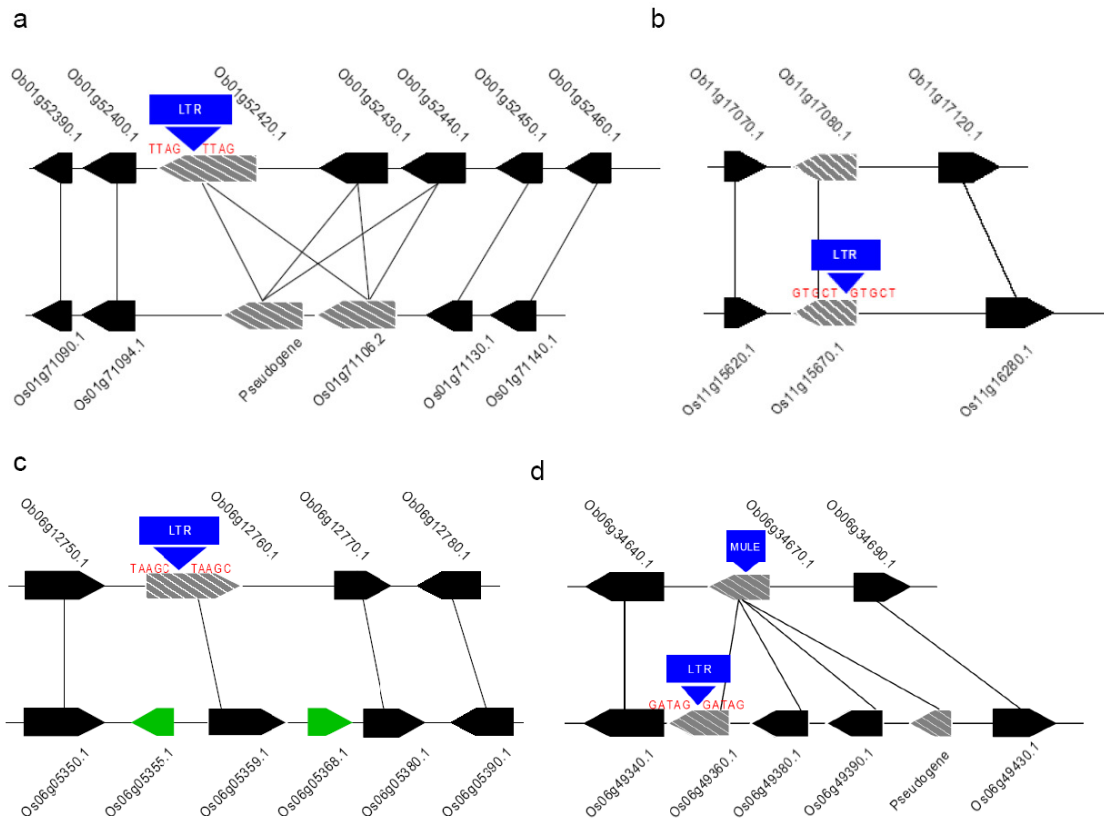

**Supplementary Figure S8 Examples of NBS-LRR type pseudogenes in *O. brachyantha* (up) and *O. sativa* (down).** We compared the gene structures of orthologous gene clusters to identify pseudogenes in both genomes. Only genes with exons interrupted by frameshift mutations or transposable element insertions were defined as pseudogenes. The pseudogenization may cause loss of function of resistance genes in these loci in one or both genomes, which contributed to the divergence of *Oryza* species. Black arrowhead boxes, genes; Shaded arrowhead boxes, pseudogenes; Green arrowhead boxes, non-collinear genes; blue boxes, transposable elements; MULE, Mutator-like element; LTR, long terminal repeat retrotransposon; Target site duplication (TSD) are in red; Orthologous genes are connected by black lines.

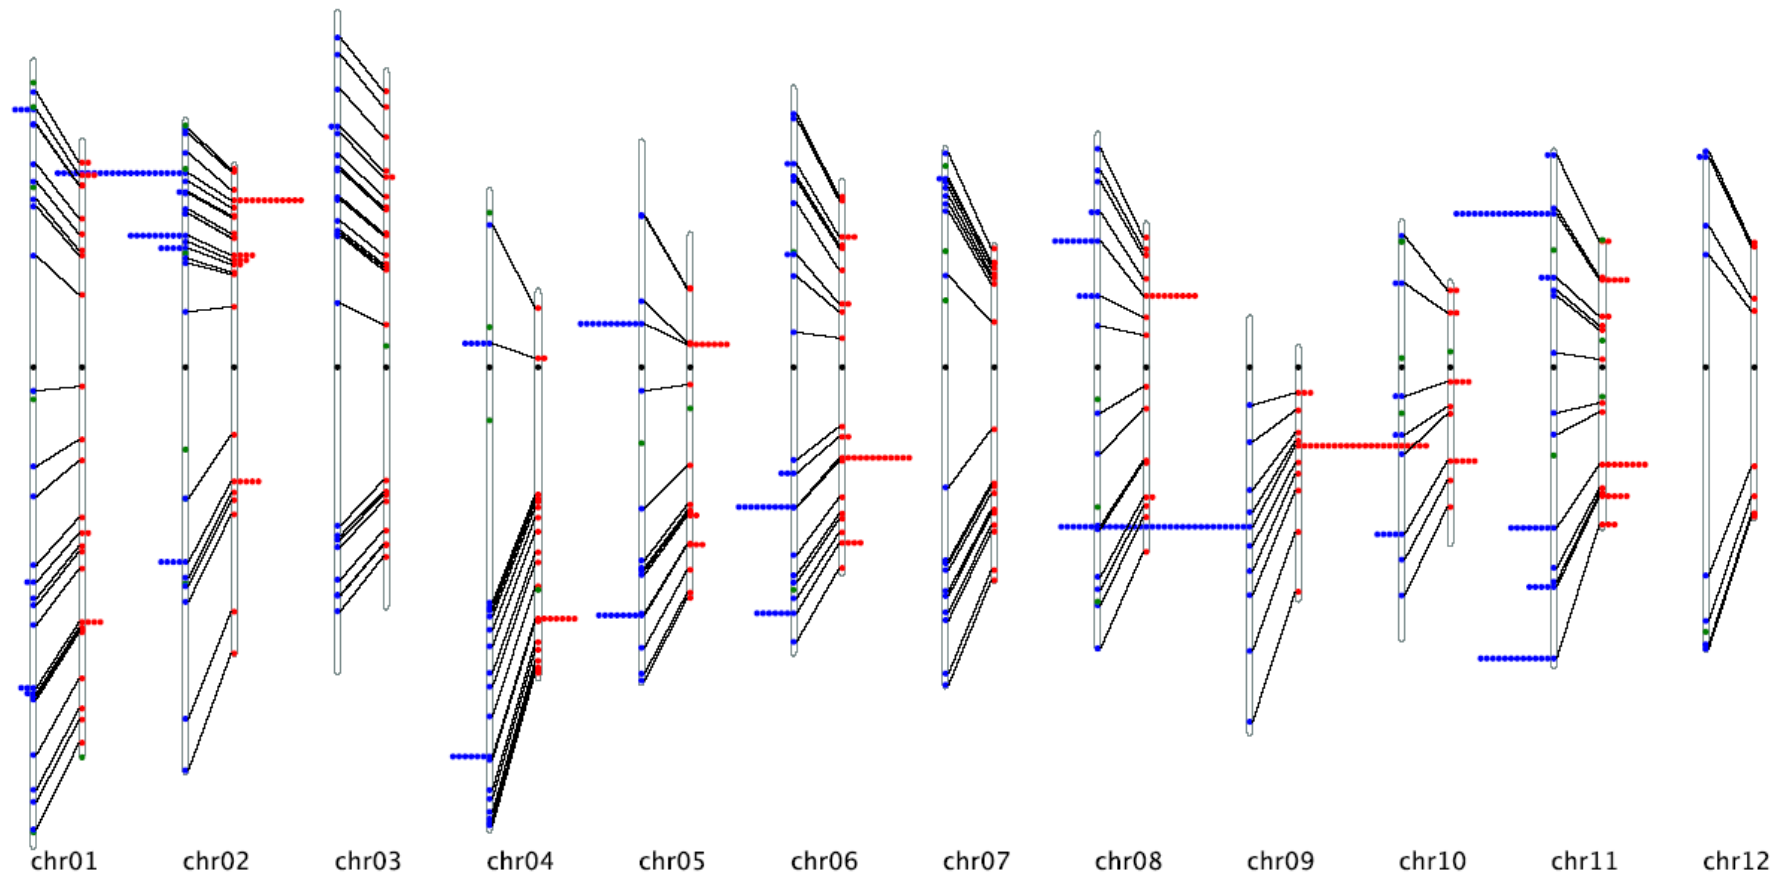

**Supplementary Figure S9 Comparisons of chromosomal distribution of RLK-LRR genes between *O. brachyantha* and *O. sativa*.** For each chromosome pair, the left one represents the chromosome of *O. sativa* and the right one represents the chromosome of *O. brachyantha*. Centromeres are indicated by solid black circles. Genes are indicated by colored circles; Tandemly duplicated genes are clustered to one representative position; Blue circles stand for genes of *O. sativa*; Red circles stand for genes of *O. brachyantha*; Green circles stand for non-collinear genes; Orthologous genes or gene clusters are connected by black lines.

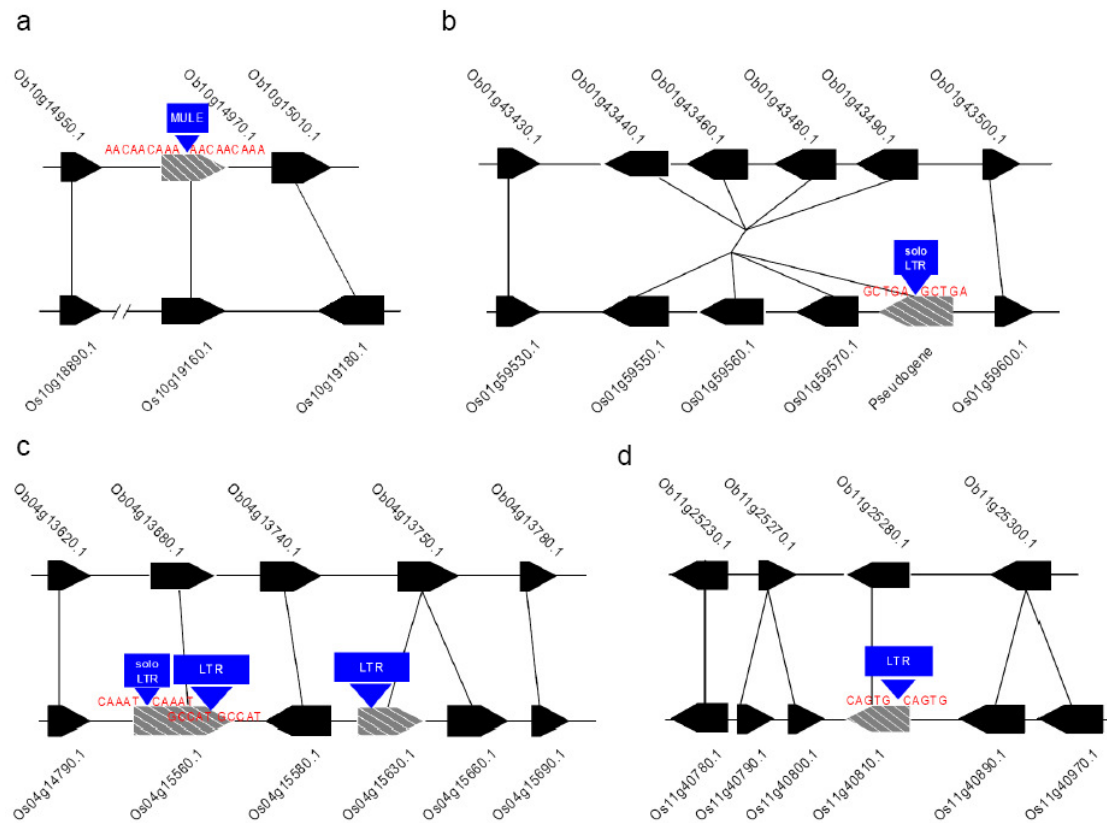

**Supplementary Figure S10 Examples of RLK-LRR type pseudogenes in *O. brachyantha* (up) and *O. sativa* (down).** We compared the gene structures of orthologous gene clusters to identify pseudogenes in both genomes. Only genes with exons interrupted by frameshift mutations or transposable element insertions were defined as pseudogenes. The pseudogenization may cause loss of function of resistance genes in these loci in one or both genomes, which contributed to the divergence of *Oryza* species. Black arrowhead boxes, genes; Shaded arrowhead boxes, pseudogenes; Green arrowhead boxes, non-collinear genes; blue boxes, transposable elements; MULE, Mutator-like element; LTR, long terminal repeat retrotransposon; Target site duplication (TSD) are in red; Orthologous genes are connected by black lines.

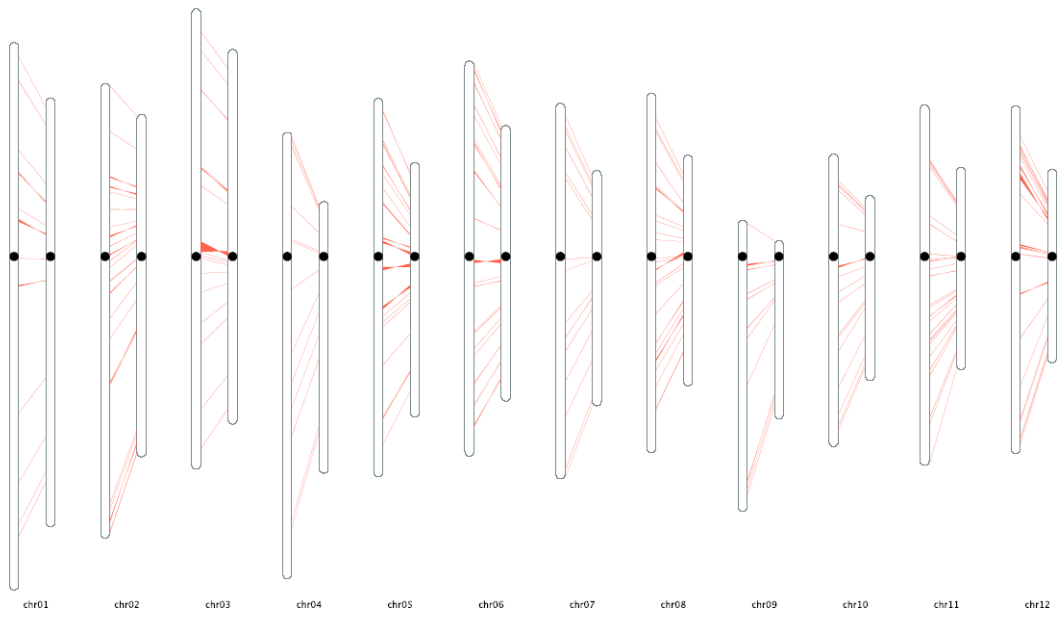

**Supplementary Figure S11 Distribution of inversions between *O. brachyantha* and *O. sativa*.** For each chromosome pair, the left one represents the chromosome of *O. sativa* and the right one represents *O. brachyantha*. Centromeres are indicated by solid black circles. Inversions are defined as described in Method and shaded by orange blocks.

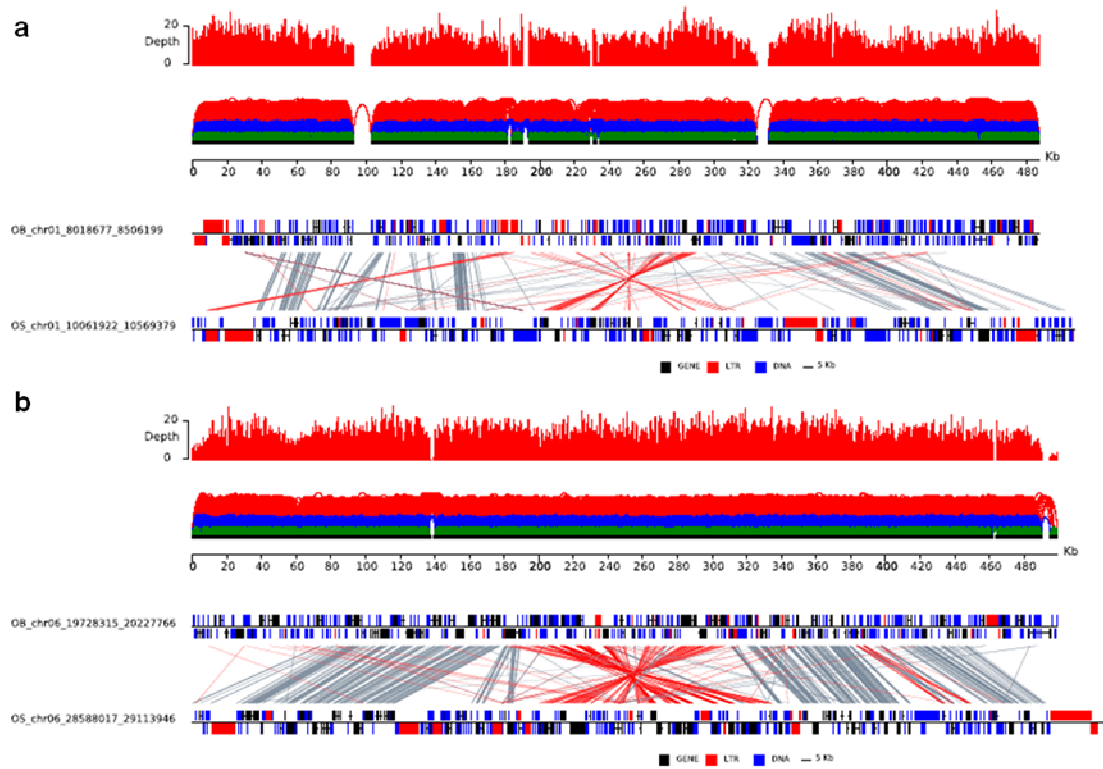

**Supplementary Figure S12 The structure variations (inversions) in *O. brachyantha* supported by paired-end mapping and read depth. (a).** OB\_chr01\_8018677\_8506199 (top) vs OS\_chr01\_10061922\_10569379 (bottom); **(b).** OB\_chr06\_19728315\_20227766 (top) vs OS\_chr06\_28588017\_29113946 (bottom). Colored arcs represented paired-end libraries of 10 kb (red), 5 kb (blue) and 2 kb (green). Read depth was calculated by 100 bp windows.



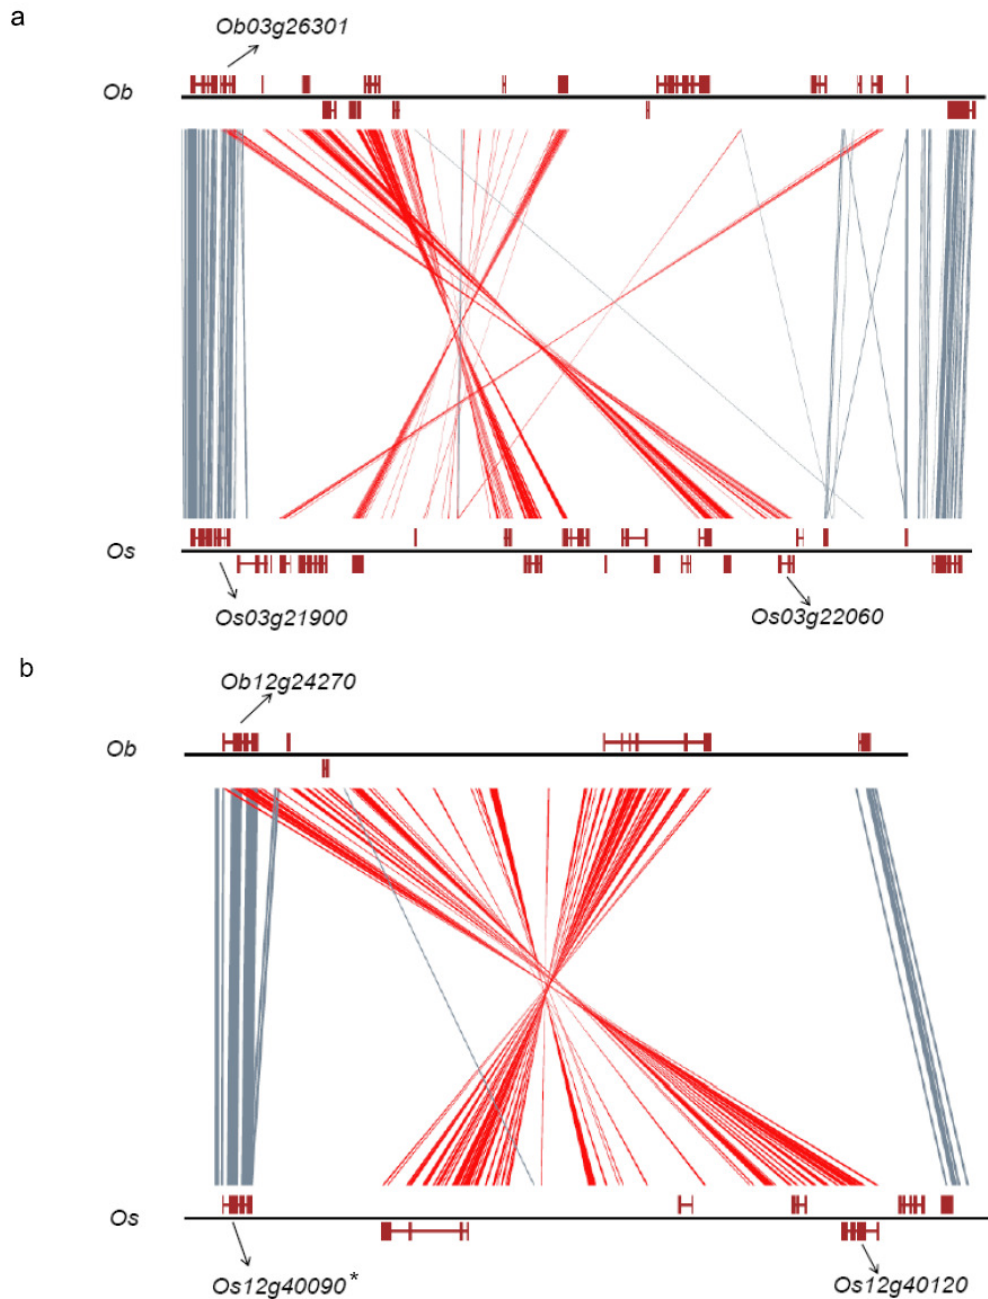

**Supplementary Figure S13 Gene duplications associated with inversions in *O. sativa*.**

Inversions and the flanking collinear genes were compared between *O. brachyantha* (*Ob*) and *O. sativa* (*Os*). Homologous sequences are connected by grey lines if the matching sequences are in direct orientation, or by red lines if the matching sequences are in reverse orientation. Pseudogenes are indicated by stars following the locus name. **(a)**, The inversion is associated with the duplication of gene *Os03g21900* in *O. sativa*. Although the duplicated genes are conserved in gene structure (data not shown), their expression patterns were diverged (Supplementary Table S10). **(b)**, The inversion is associated with the duplication of gene *Os12g40090* in *O. sativa*. By comparing the gene duplications with their orthologs in related species, we found gene *Os12g40090*, which is the original copy of the duplicated gene *Os12g40120*, was pseudogenized due to a 2 bp deletion (Supplementary Fig. S14). The gene expression data also supports the pseudogenization of *Os12g40090* (Supplementary Table S10).

2 bp deletion cause frameshift mutation in *Os12g40090*

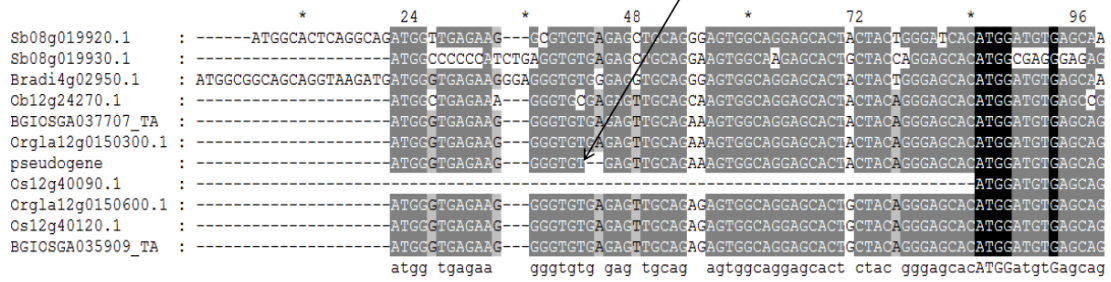

**Supplementary Figure S14 Pseudogenization of the parent gene of the inversion-associated duplicated gene in *O. sativa*.** Protein-coding sequences of the inversion-associated duplicated gene *Os12g40120* and the parent gene *Os12g40090* (pseudogene) were aligned with their orthologs in *indica* rice (*BGIOSGA037707\_TA*, *BGIOSGA035909\_TA*), *O. glaberrima* (*Orgla12g0150300.1*, *Orgla12g0150600.1*), *O. brachyantha* (*Ob12g24270.1*), *Brachypodium distachyon* (*Bradi4g02950.1*) and *Sorghun bicolor* (*Sb08019920.1*, *Sb08g019930.1*). The translation start site of orthologous genes are conserved except for *Os12g40090.1*, which have a 2 bp deletion leading to the pseudogenization of this gene.

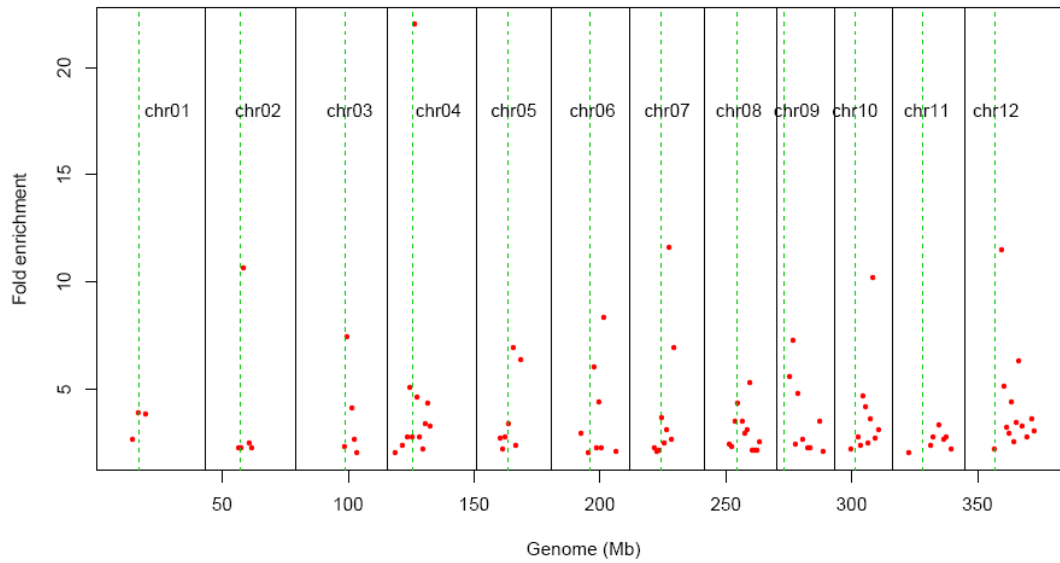

**Supplementary Figure S15 Fold enrichment of non-collinear genes in *O. sativa*.** The number of collinear genes and evidence-based non-collinear genes were counted in every 1 Mb window along the chromosomes of *O. sativa*. The enrichment of non-collinear genes in each 1 Mb window was tested against the genome average number of collinear genes and evidenced non-collinear genes in 1 Mb by Chi-squared test. Fold enrichments were calculated by the ratio between the proportion of non-collinear genes in each 1 Mb window and the genome average proportion of non-collinear genes in 1 Mb. Only significant enriched regions are shown in this figure ( $P$ -value  $\leq 0.05$ ). Dashed green lines vertical to the x-axis indicate the position of centromere for each chromosome. The chromosomes are separated by black lines vertical to the x-axis.

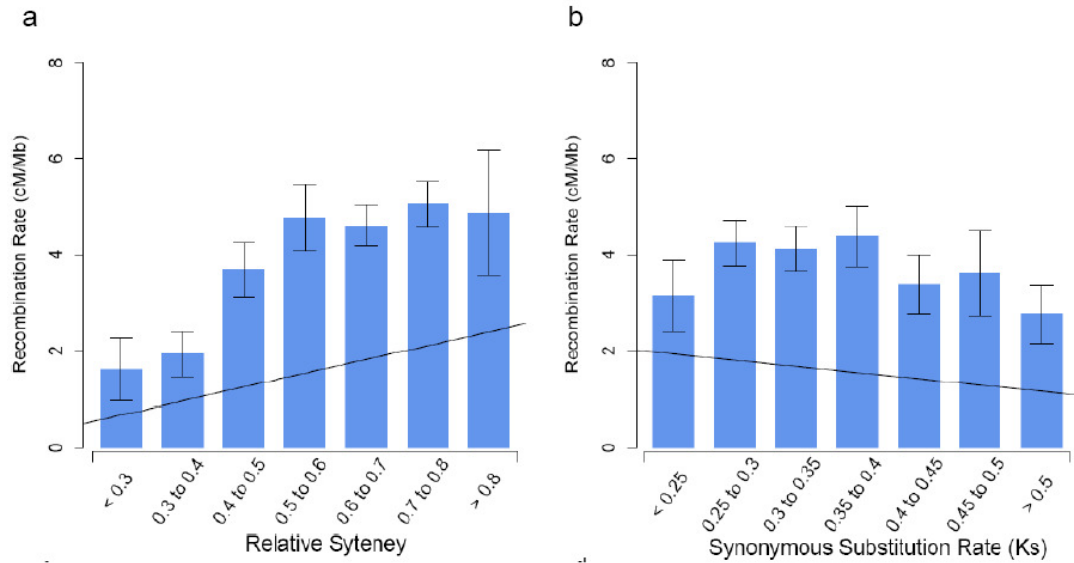

**Supplementary Figure S16 Syntenicity along the chromosomes between *O. brachyantha* and *O. sativa*.** (a), Correlation of relative syntenicity with recombination rate ( $R = 0.39$ ,  $P\text{-value} \leq 2.2 \times 10^{-16}$ ). (b), Correlation of synonymous substitution rate ( $K_s$ ) with recombination rate ( $R = -0.13$ ,  $P\text{-value} \leq 0.0007$ ). The genetic and physical positions of genetic markers from Japanese Rice Genome Program (<http://rgp.dna.affrc.go.jp>) were obtained from Rice Genome Annotation Project (<http://rice.plantbiology.msu.edu>). Recombination rates along each chromosome were estimated by the ratio of genetic distance to physical distance in 1 Mb window with 0.5 Mb shift. Relative syntenicity was estimated by the ratio of non-collinear gene number to total gene number in 1 Mb window with 0.5 Mb shift. Average synonymous substitution rate ( $K_s$ ) of collinear gene pairs in 1 Mb window with 0.5 Mb shift was estimated using Nei-Gojibori Method as implemented in PAML (<http://abacus.gene.ucl.ac.uk/software/paml.html>). The Pearson's correlation was estimated using R language ([www.r-project.org](http://www.r-project.org)).

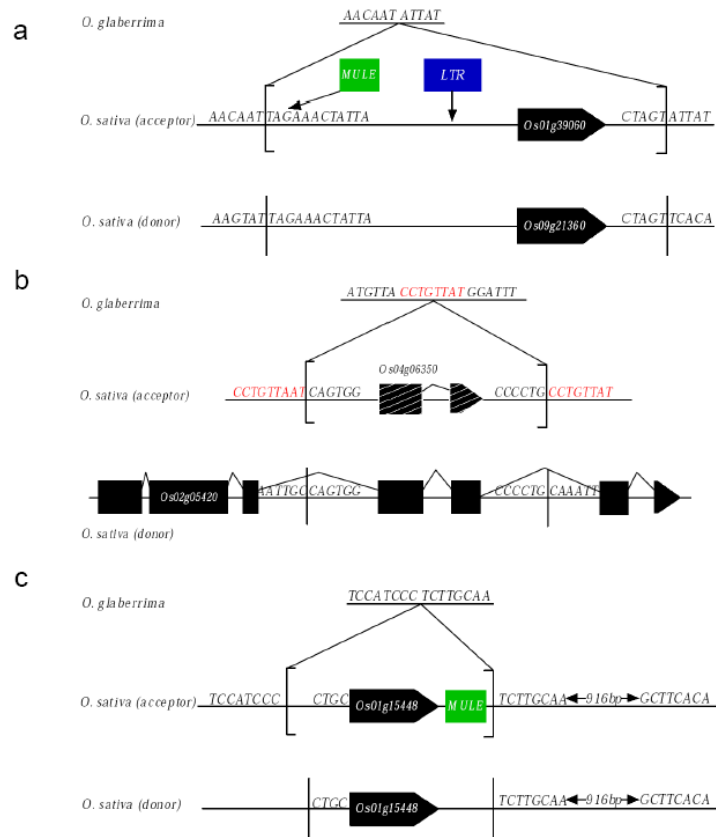

**Supplementary Figure S17 Breakpoint signatures of non-collinear genes formed by sequence duplications.** (a), Signatures of locus *Os01g39060* (8-AMINO-7-OXONONANOATE SYNTHASE), which is shown in Figure 5a and Figure 5b I. Transposable elements were inserted after the duplication. (b), Signatures of locus *Os04g06350*, which is shown in Figure 5b II. Only two exons were duplicated to the acceptor site, which may form a pseudogene at the duplicated locus. (c), Signatures of locus *Os01g15448*, which is shown in Figure 5b III. The 932-base-pair sequence downstream of the duplicated region on the acceptor site is highly homologous to the donor site and possibly serves as the template in the repair of double-strand breaks. Red characters, target site duplication (TSD); black arrowhead boxes, genes; shaded black arrowhead boxes, pseudogenes; blue boxes, LTR retrotransposons; green boxes, DNA transposons; orange boxes, non-LTR retrotransposons; sequences between square brackets on acceptor sequences indicate the duplicated sequences. Sequences between black lines on donor sequences show the candidate for donors of duplicated sequences.

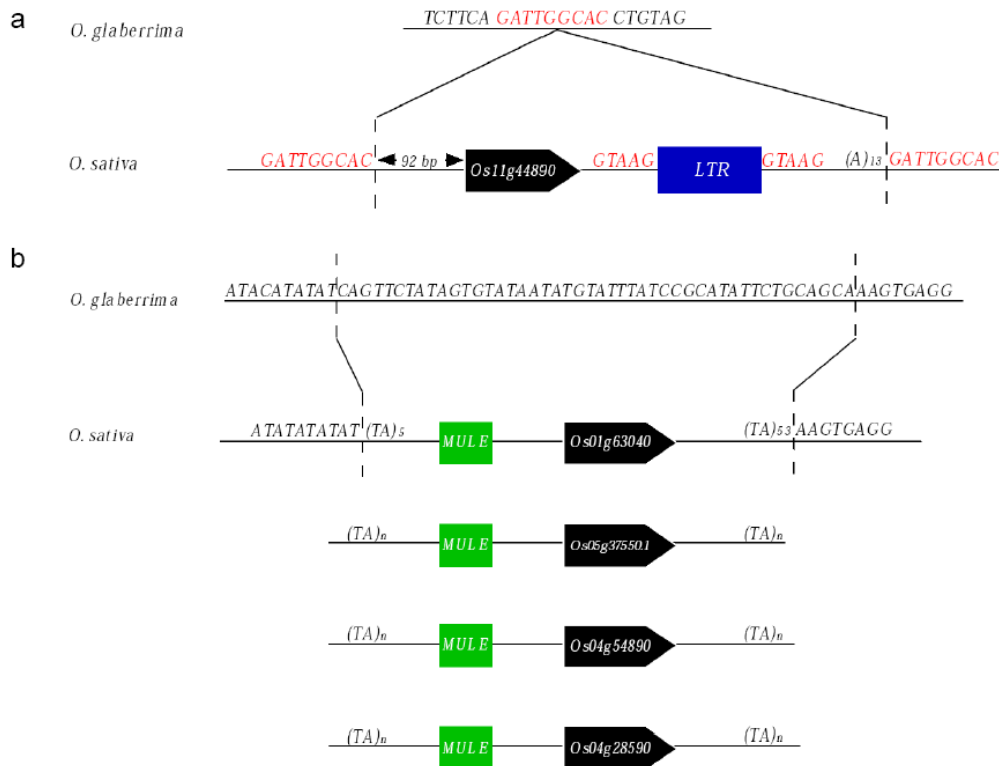

**Supplementary Figure S18 Breakpoint signatures of non-collinear genes formed by sequence duplications without identified donor sequences.** (a), Signatures of locus *Os11g44890* (Zinc knuckle family protein), which is shown in Figure 5b V. The insertion contains a single-exon gene and have poly-A tracts immediately adjacent to the target site duplication (TSD), suggesting the duplication was possibly formed by retroposition. (b), Signatures of locus *Os01g63040* (Ankyrin-like protein), which is shown in Figure 5b IV. Multi-copies of this locus were found in the rice genome. The present of TA repeats flanking the insertions suggests that the duplication was possibly induced by the repair of double-strand breaks, which occurred frequently in tandemly repeated sequences.

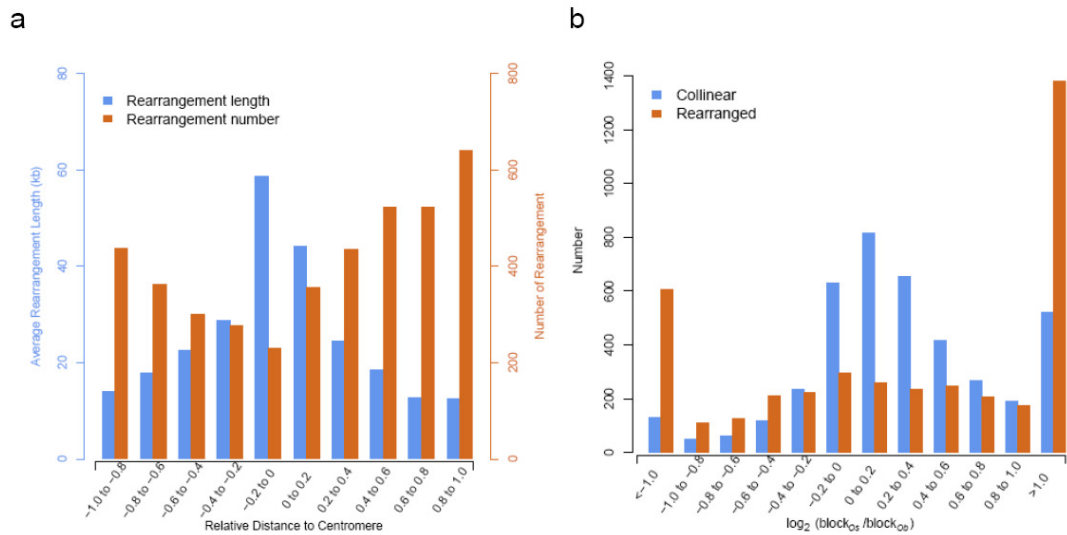

**Supplementary Figure S19 The distribution of sequence rearrangements and their size differences compared with collinear regions between *O. brachyantha* and *O. sativa*.** (a), The number and length of sequence rearrangements along the chromosomes. (b), Size comparison of collinear and rearranged regions between *O. brachyantha* and *O. sativa*. The collinear and rearrangement regions are defined as described in Method. The positions of sequence rearrangements on the chromosomes are scaled as relative distance to centromere, where negative values stand for regions on the short arms and positive values stand for the long arms. The size variations were calculated by log-ratio of block sizes between *O. brachyantha* and *O. sativa*. A positive value suggests expansion in *O. sativa*, whereas negative value suggests expansion in *O. brachyantha*.

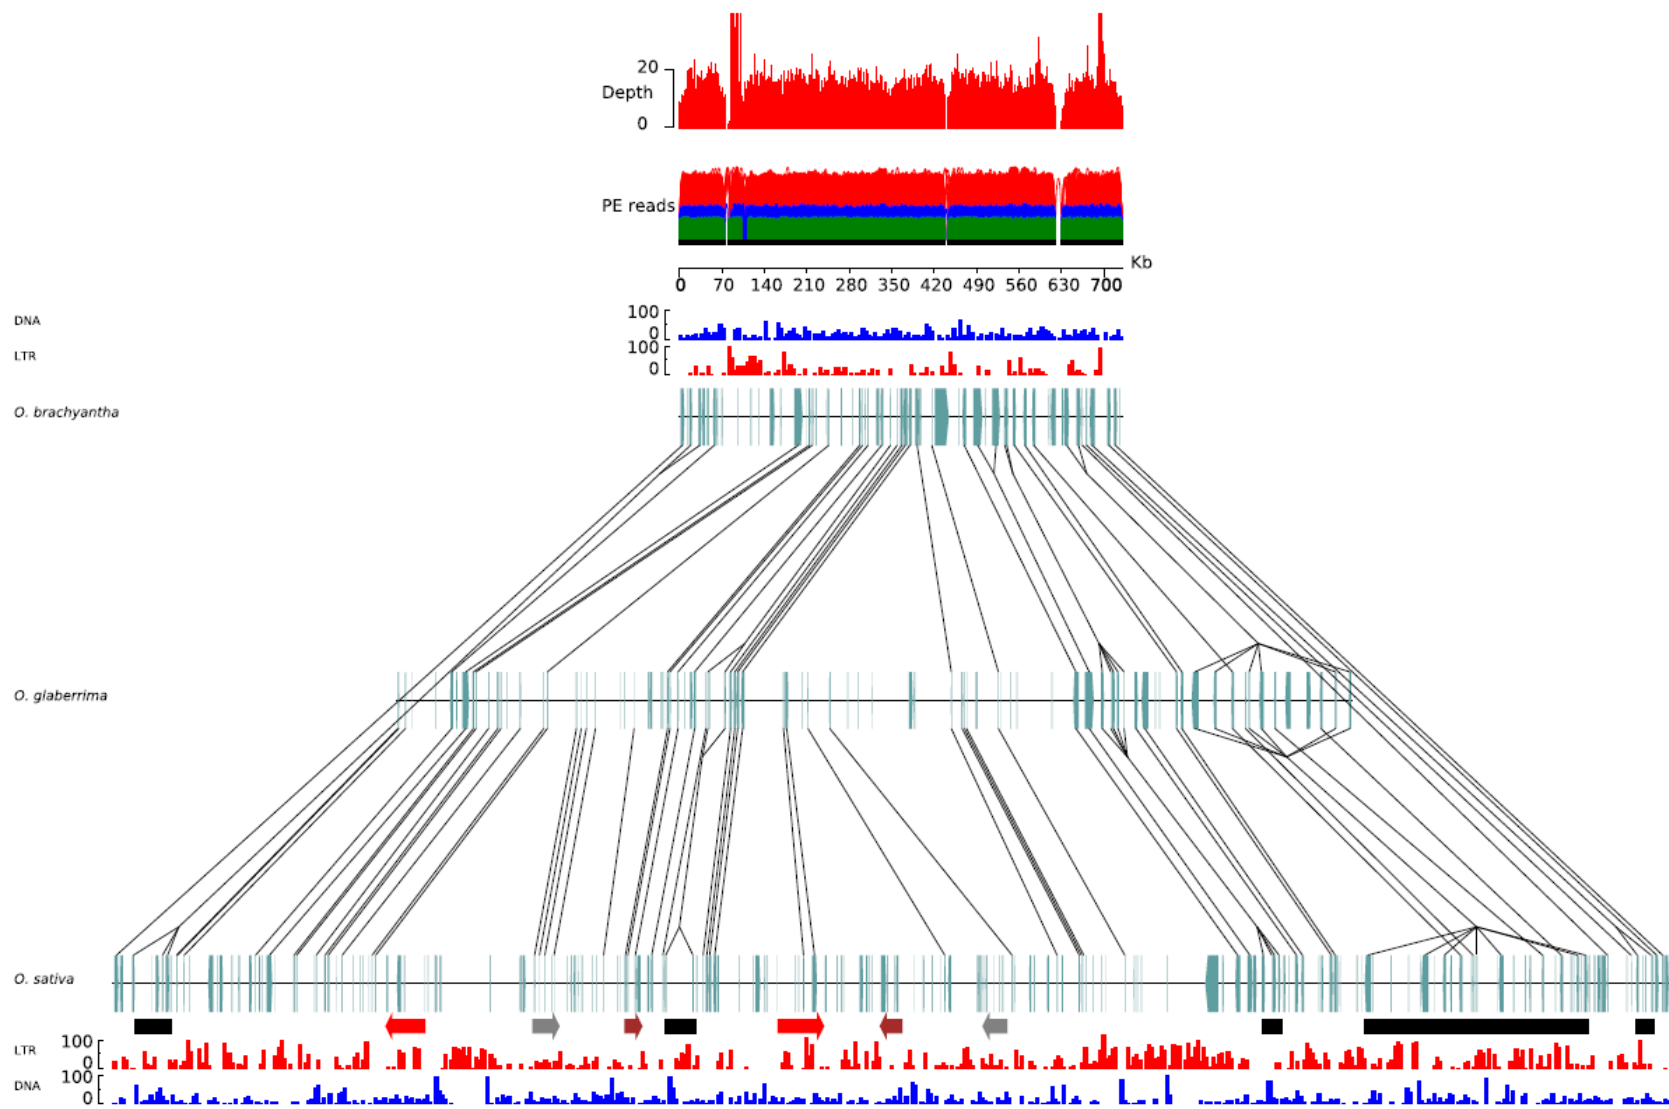



**Supplementary Figure S20 Comparative analysis of the H7 heterochromatic domains among *O. brachyantha*, *O. glaberrima* and *O. sativa*.** Genes are indicated by cadetblue boxes; orthologous genes or gene clusters are connected by black lines; Tandem gene clusters are highlighted by black rectangles; Organellar insertions are highlighted by yellow rectangles; Segmental duplications (SD) are highlighted by colored rectangles, each color representing one pair of SD. Red and black bars along the sequences illustrate the density of LTR retrotransposons and DNA transposons in 5 kb window. Colored arcs represented paired-end libraries of 10 kb (red), 5 kb (blue) and 2 kb (green). Read depth was calculated by 100 bp windows.

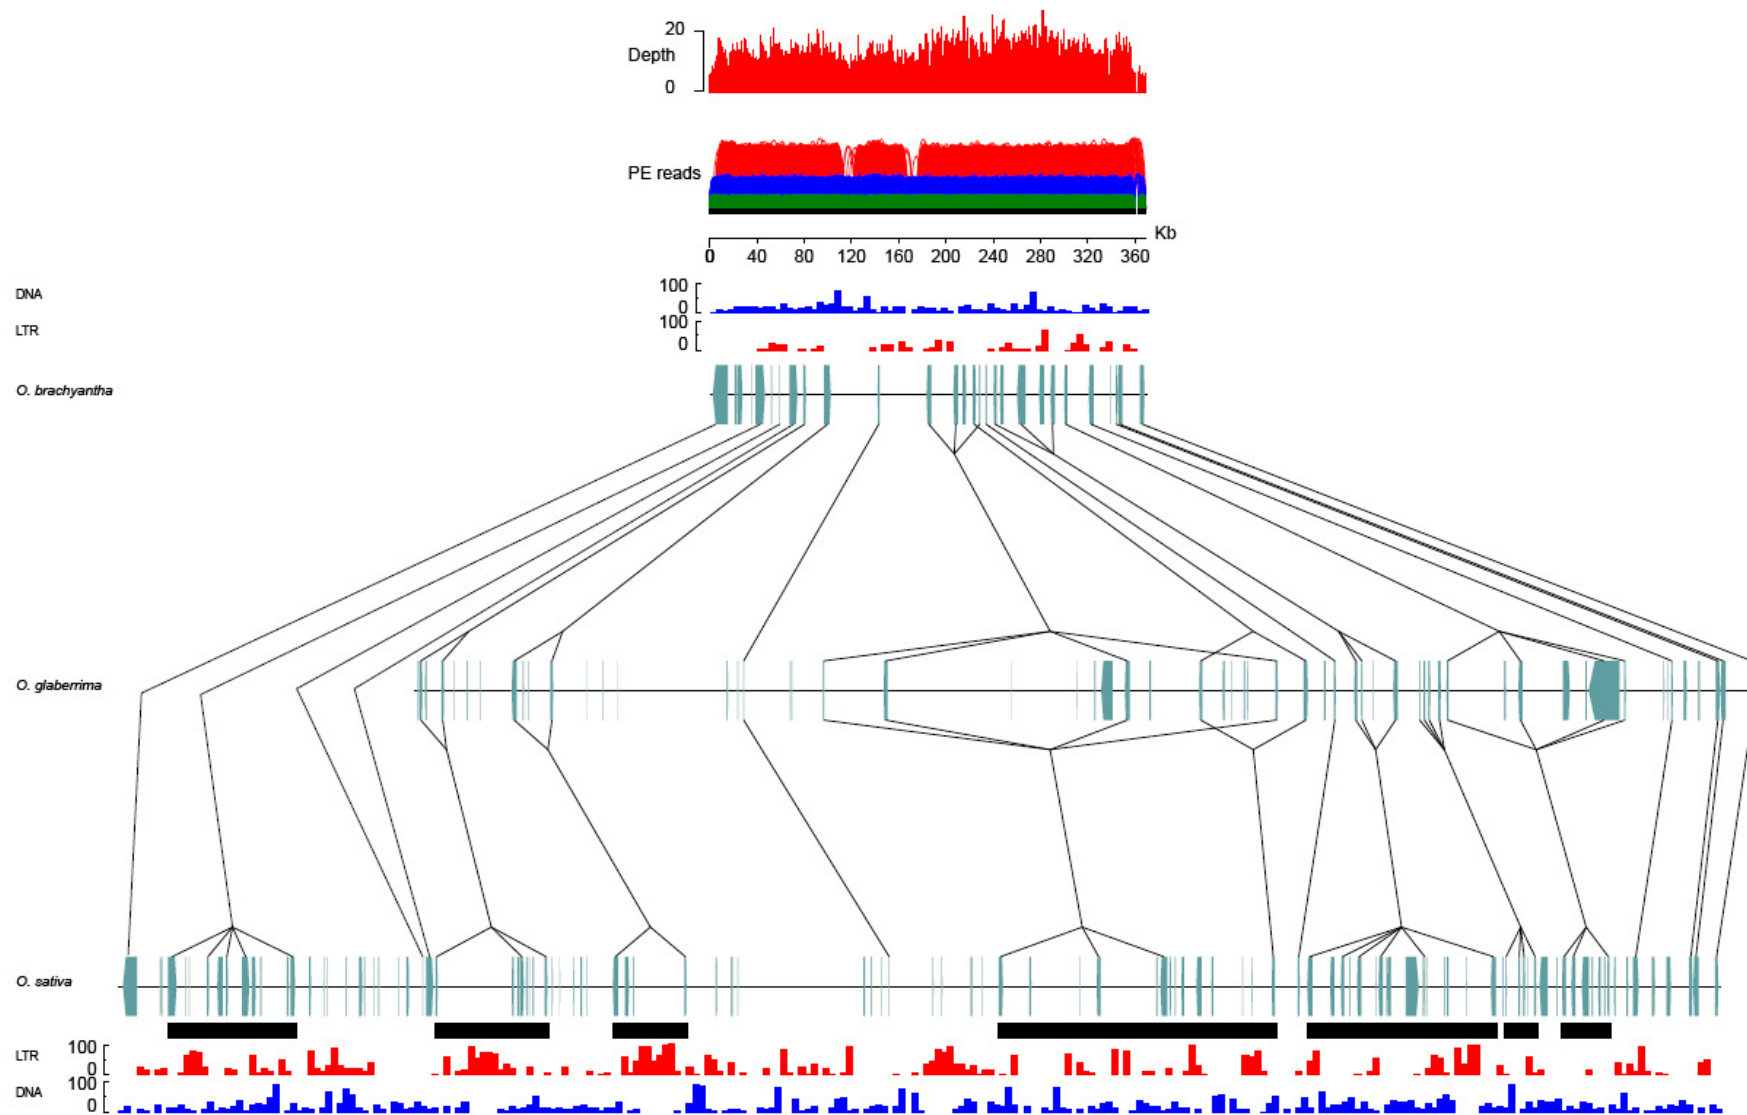

**Supplementary Figure S21 Comparative analysis of the H8 heterochromatic domains among *O. brachyantha*, *O. glaberrima* and *O. sativa*.** Genes are indicated by cadetblue boxes; orthologous genes or gene clusters are connected by black lines; Tandem gene clusters are highlighted by black rectangles; Organellar insertions are highlighted by yellow rectangles; Segmental duplications (SD) are highlighted by colored rectangles, each color representing one pair of SD. Red and black bars along the sequences illustrate the density of LTR retrotransposons and DNA transposons in 5 kb window. Colored arcs represented paired-end libraries of 10 kb (red), 5 kb (blue) and 2 kb (green). Read depth was calculated by 100 bp windows.

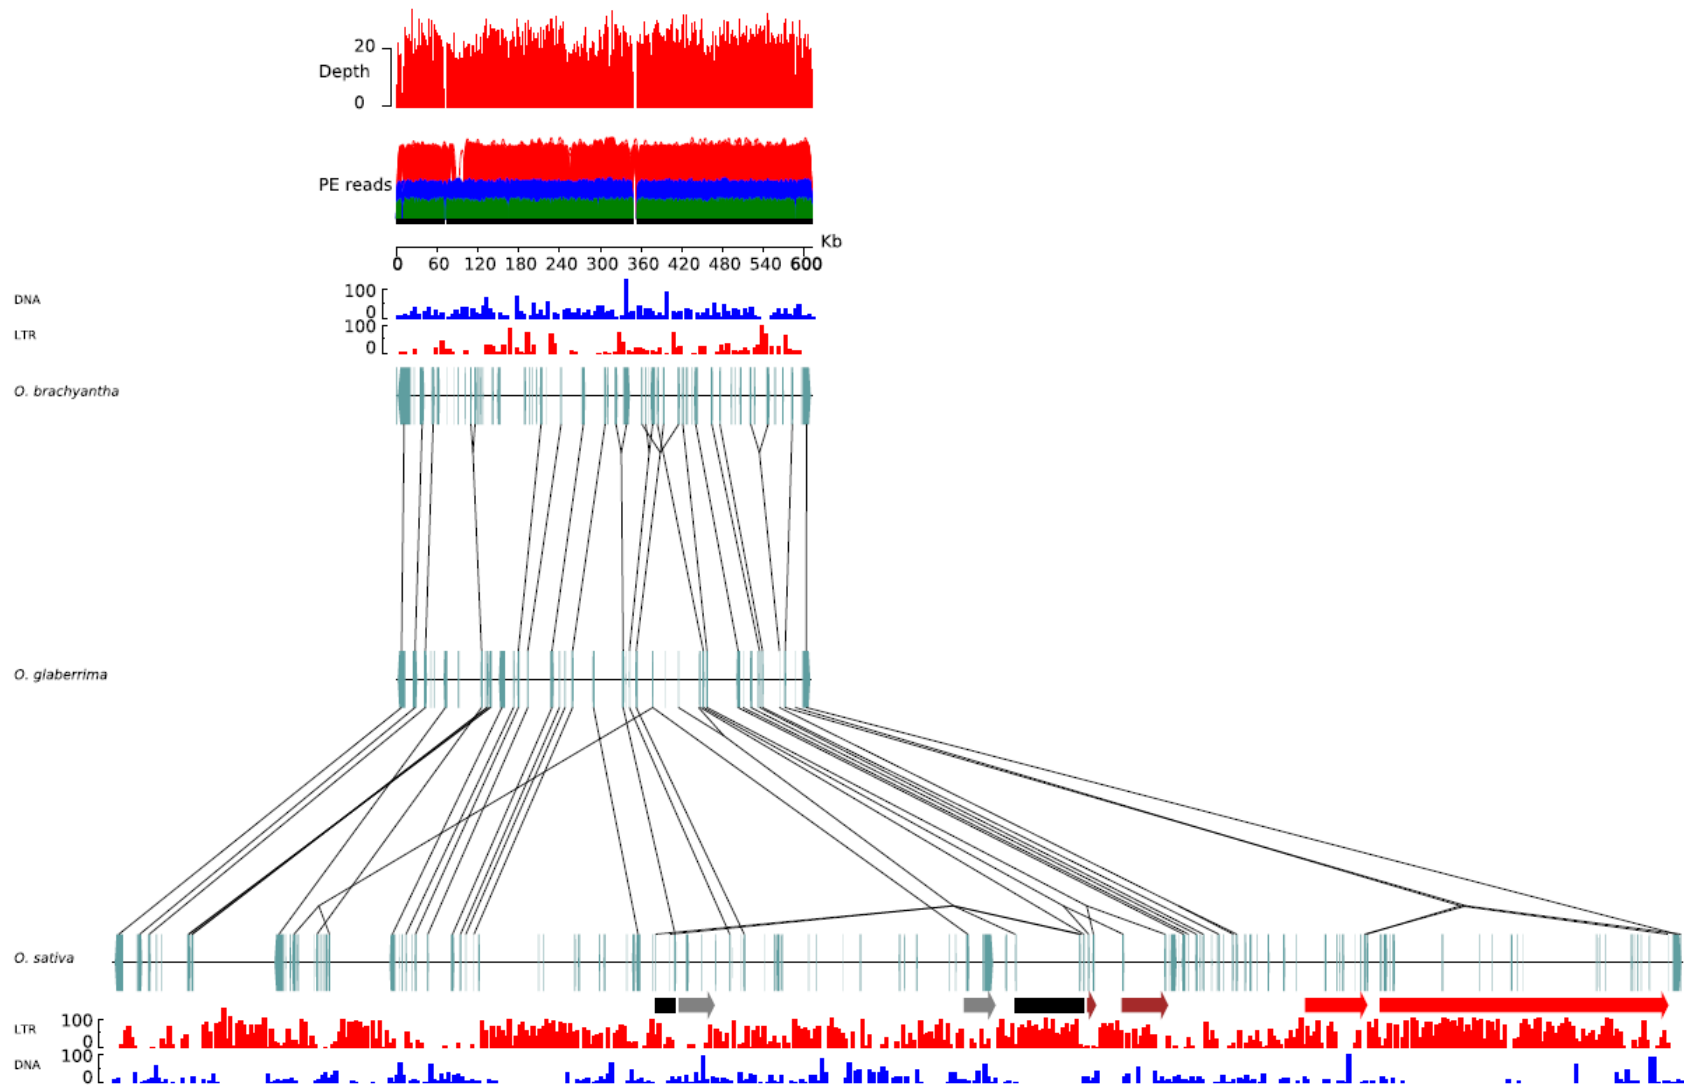

**Supplementary Figure S22 Comparative analysis of the H1 heterochromatic domains among *O. brachyantha*, *O. glaberrima* and *O. sativa*.** Genes are indicated by cadetblue boxes; orthologous genes or gene clusters are connected by black lines; Tandem gene clusters are highlighted by black rectangles; Organellar insertions are highlighted by yellow rectangles; Segmental duplications (SD) are highlighted by colored rectangles, each color representing one pair of SD. Red and black bars along the sequences illustrate the density of LTR retrotransposons and DNA transposons in 5 kb window. Colored arcs represented paired-end libraries of 10 kb (red), 5 kb (blue) and 2 kb (green). Read depth was calculated by 100 bp windows.

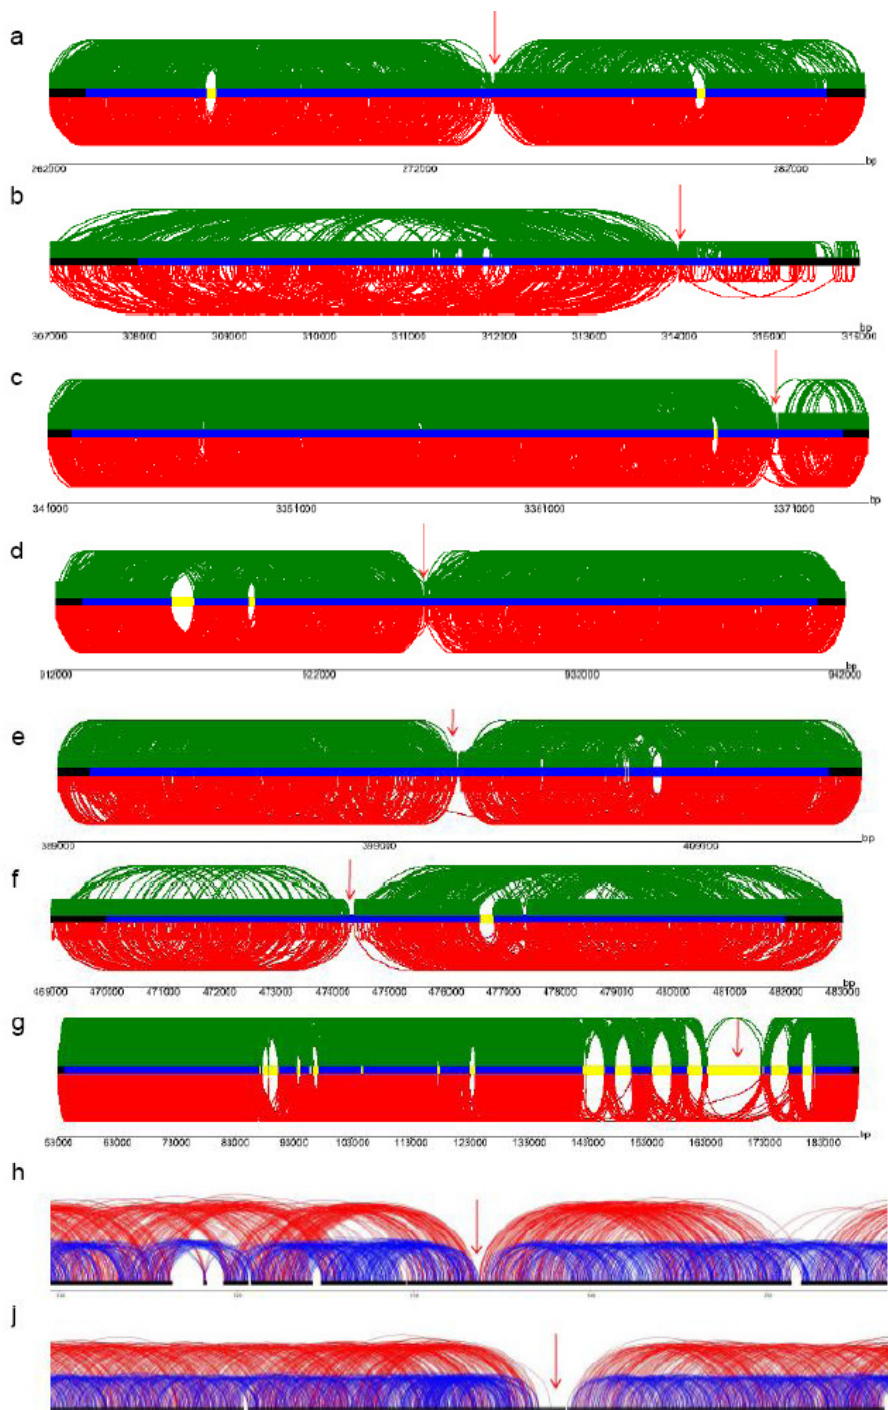

**Supplementary Figure S23 Validation of sequence assemblies which are inconsistent with the physical map.** The locations of uniquely mapped pair-end reads described in Supplementary Table S1 were drawn on scaffolds with inconsistency between sequence assemblies and physical map. Pair-end reads with unexpected orientation or distance were drawn in red, except for h-j which showed only correctly mapped pair-end reads. Misassembled points are indicated by red arrows. The gap regions on

scaffolds are shown by yellow color (a-g) or left blank (h-j). The lack of pair-end reads covering these regions suggests that the nine inconsistencies were caused by misassemblies in sequence assembly.

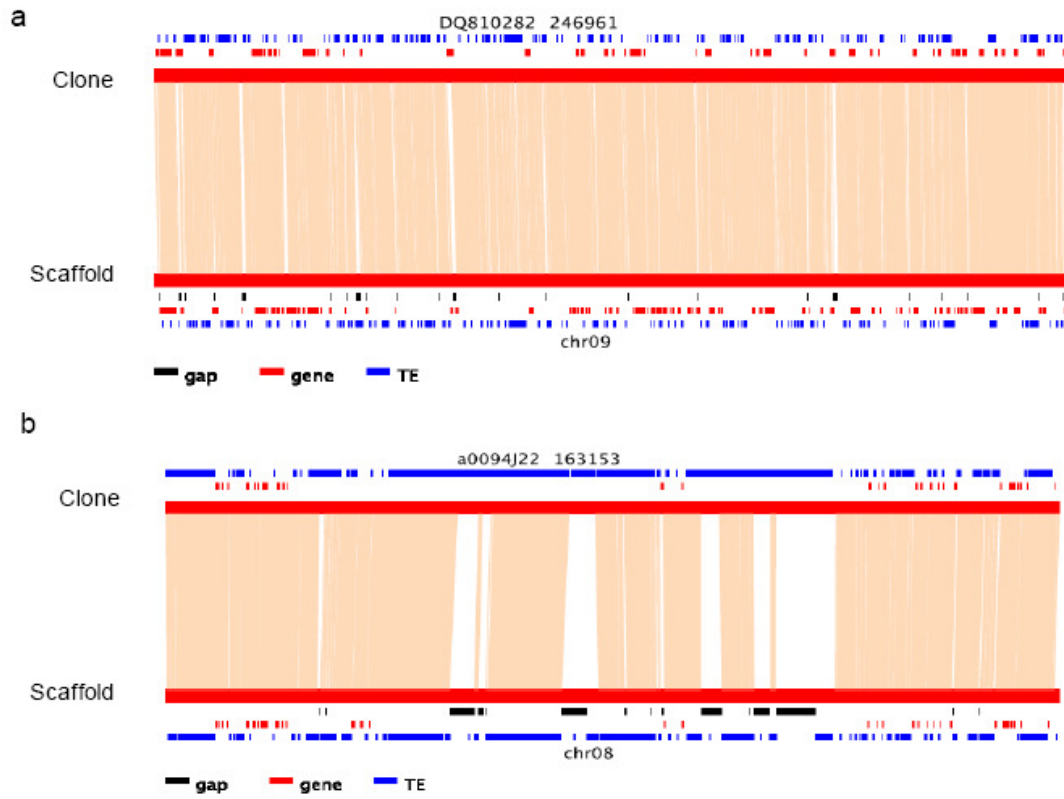

**Supplementary Figure S24 Comparison of sequence assembly with BAC clones sequenced by Sanger technology.** Scaffold sequences were aligned with BAC sequences using BLASTN with an E-value of  $1 \times 10^{-10}$ . High-scoring segment pairs (HSP) longer than 200 bp are connected by pink lines. Genes, transposable elements (TE), and sequence gaps are indicated by red, blue and black boxes, respectively. The sequence gaps in the euchromatic regions tend to be small and are located in high GC regions (Supplementary Fig. S27). In pericentromeric regions, these large gaps are located on repetitive sequences. **(a)**, BAC clone a0002C07 located in the euchromatic region (Accession: DQ810282). **(b)**, BAC clone a0094J22 located in the pericentromeric region.

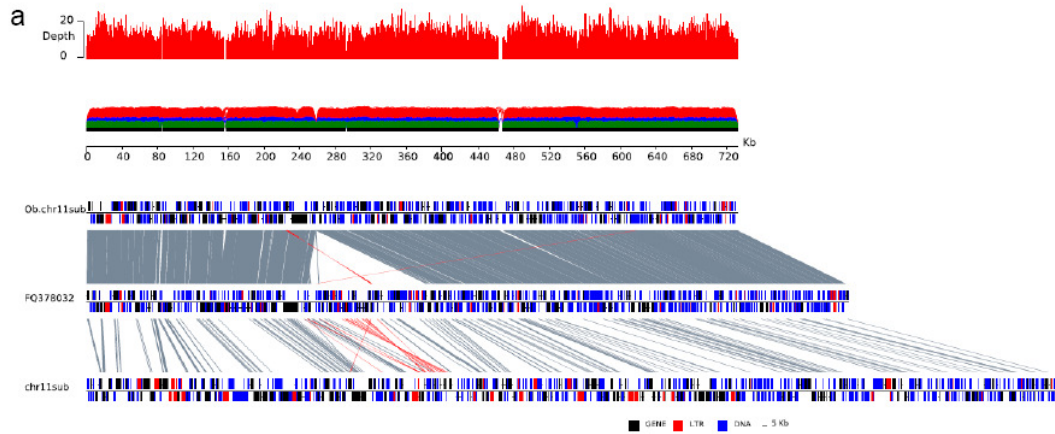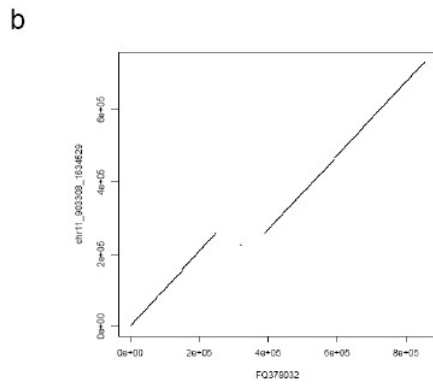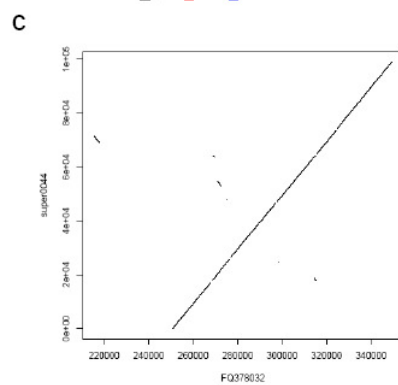

**Supplementary Figure S25 The quality of the assembled sequence corresponding to chromosome 11 segmental duplication region (FQ378032) assessed by paired-end mapping and read depth. (a), FQ378032 (middle) was compared with the corresponding sequence in *O. brachyantha* (Ob.chr11sub, top) and *O. sativa* (chr11sub, bottom). Colored arcs represented paired-end libraries of 10 kb (red), 5 kb (blue) and 2 kb (green). Read depth was calculated by 100 bp windows. (b), Dotplot of FQ378032 with corresponding sequence in *O. brachyantha*. (c), Dotplot of FQ378032 with the unanchored superscaffold (super0044).**



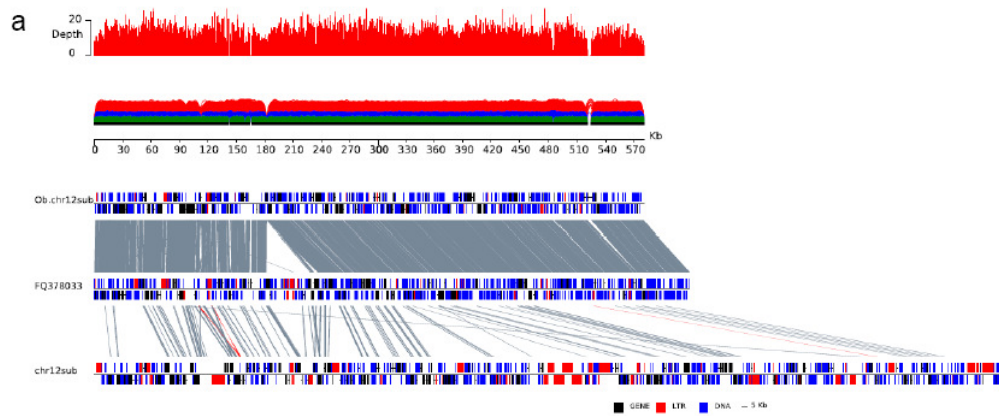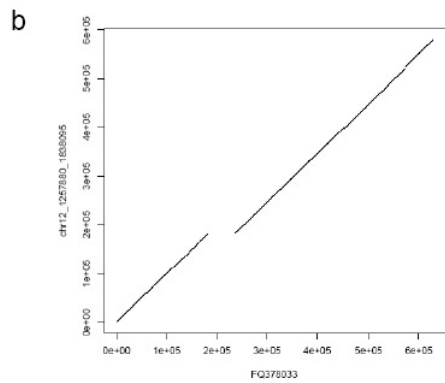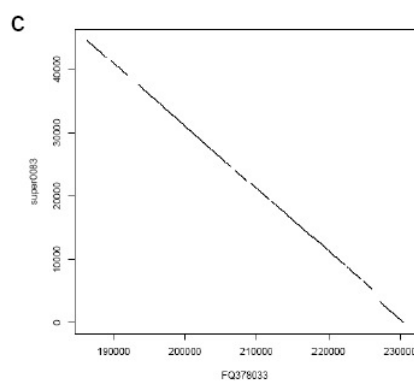

**Supplementary Figure S26 The quality of the assembled sequence corresponding to chromosome 12 segmental duplication region (FQ378033) assessed by paired-end mapping and read depth. (a),** FQ378033 (middle) was compared with the corresponding sequence in *O. brachyantha* (Ob.chr12sub, top) and *O. sativa* (chr12sub, bottom). Colored arcs represented paired-end libraries of 10 kb (red), 5 kb (blue) and 2 kb (green). Read depth was calculated by 100 bp windows. **(b),** Dotplot of FQ378033 with corresponding sequence in *O. brachyantha*. **(c),** Dotplot of FQ378033 with the unanchored superscaffold (super0083).

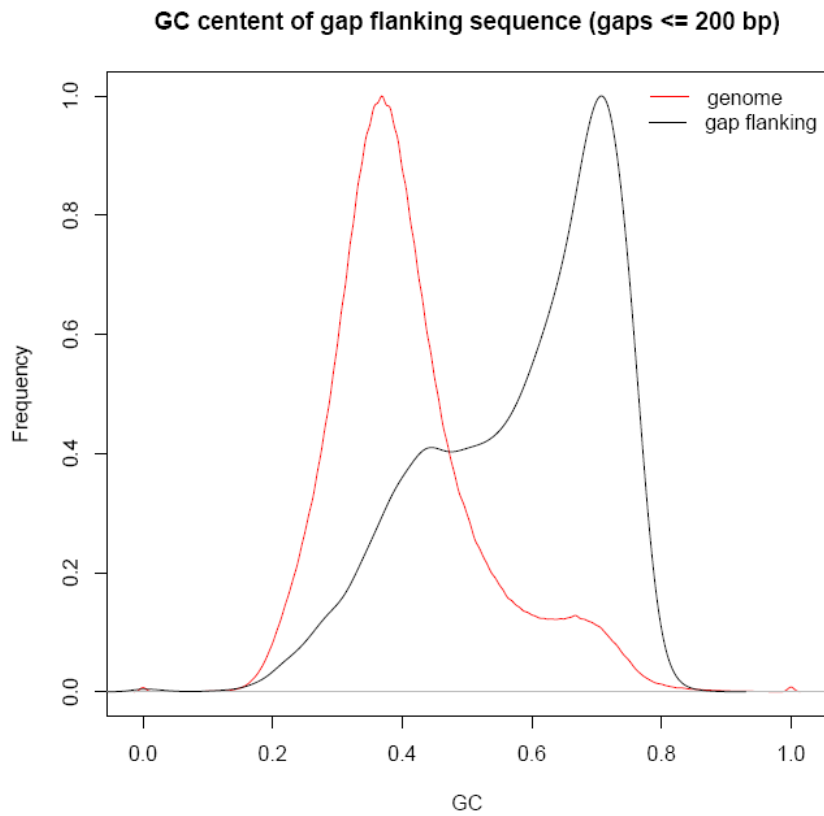

**Supplementary Figure S27 GC content of 200 bp flanking sequence of small gaps ( $\leq 200$  bp).**

Flanking sequences of 200 bp of the small gaps were retrieved from the scaffold sequences. The genome of *Oryza brachyantha* was shuffled into 200 bp fragments to use as control for genome average GC content. The high GC content peak of gap flanking sequences at 75-80% suggests that a large proportion of the small gaps were failed to close due to low sequence coverage for high GC regions.

## Supplementary Tables

**Supplementary Table S1 Libraries used for the sequence assembly**

| Sequence Data     | Insert Size | Total Data (Gb) | Read Length (bp) | Sequence Coverage (X) | Physical Coverage (X) |
|-------------------|-------------|-----------------|------------------|-----------------------|-----------------------|
| Solexa Reads      | 200bp       | 7.56            | 75, 100          | 25.20                 | 21.94                 |
|                   | 350bp       | 8.67            | 75               | 28.88                 | 75.65                 |
|                   | 650bp       | 5.04            | 75               | 16.80                 | 71.90                 |
|                   | 2kb         | 3.65            | 44               | 12.17                 | 300.48                |
|                   | 5kb         | 4.13            | 44               | 13.77                 | 743.36                |
|                   | 10kb        | 2.16            | 44               | 7.20                  | 854.08                |
| BAC end sequences | 130kb       | 0.045           | 672              | 0.15                  | 14                    |
| Total             |             | 31.21           |                  | 104.02                | 2067.42               |

**Supplementary Table S2 Summary on statistics of the sequence assembly**

|                          | Contig   |        | Scaffold |        | Super-Scaffold |        |
|--------------------------|----------|--------|----------|--------|----------------|--------|
|                          | Size(bp) | Number | Size(bp) | Number | Size(bp)       | Number |
| N90                      | 5992     | 11898  | 158856   | 332    | 263373         | 195    |
| N80                      | 9671     | 8752   | 308860   | 217    | 529280         | 126    |
| N70                      | 13041    | 6597   | 459159   | 149    | 888938         | 87     |
| N60                      | 16468    | 4933   | 683080   | 101    | 1263858        | 63     |
| N50                      | 20372    | 3603   | 1013071  | 70     | 1612996        | 45     |
| Longest                  | 172014   |        | 4900882  |        | 8861877        |        |
| Total Size               | 2.43E+08 |        | 2.63E+08 |        | 2.61E+08       |        |
| Total Number<br>(>100bp) |          | 28981  |          | 7999   |                | 7803   |
| Total Number<br>(>2kb)   |          | 16716  |          | 850    |                | 654    |

**Supplementary Table S3 Summary of the transposable elements in the *O. brachyantha***

**genome**

| Superfamily             | Copy number<br>( $\times 10^3$ ) | Occupied size<br>(bp) | Percentage of genome<br>(%) <sup>a</sup> |
|-------------------------|----------------------------------|-----------------------|------------------------------------------|
| <b>Class I</b>          | <b>52.8</b>                      | <b>25469313</b>       | <b>10.47</b>                             |
| LTR retrotransposon     | 32.8                             | 21271582              | 8.74                                     |
| Ty1-copia               | 12.0                             | 7522651               | 3.09                                     |
| Ty3-gypsy               | 10.8                             | 11020417              | 4.53                                     |
| Unclassified            | 3.6                              | 738779                | 0.30                                     |
| Other                   | 6.4                              | 1989735               | 0.82                                     |
| Non-LTR retrotransposon | 20.0                             | 4197731               | 1.73                                     |
| LINEs                   | 19.1                             | 4083483               | 1.69                                     |
| SINES                   | 0.9                              | 114248                | 0.05                                     |
| <b>Class II</b>         | <b>167.8</b>                     | <b>45492659</b>       | <b>18.70</b>                             |
| Mutator                 | 70.4                             | 18299216              | 7.52                                     |
| hAT                     | 26.8                             | 7827987               | 3.22                                     |
| CACTA                   | 8.4                              | 3883302               | 1.60                                     |
| PIF/Harbinger           | 14.3                             | 3190864               | 1.31                                     |
| Tc1/Mariner             | 3.9                              | 667655                | 0.27                                     |
| Helitron                | 13.9                             | 2817571               | 1.16                                     |
| MITEs                   | 44.0                             | 8806064               | 3.62                                     |
| Tourist                 | 23.1                             | 5200414               | 2.14                                     |
| Stowaway                | 20.9                             | 3605650               | 1.48                                     |
| <b>Total TEs</b>        | <b>220.6</b>                     | <b>70961972</b>       | <b>29.17</b>                             |

<sup>a</sup> Percentage was estimated based on the gap-free genome size of 243 Mb.

**Supplementary Table S4 Summary of the solo-LTR families in *O. brachyantha* and *O. sativa***

| Retroelements in <i>O. brachyantha</i> |             |          |      |               | Homologous elements in <i>O. sativa</i> |               |             |          |          |      |               |
|----------------------------------------|-------------|----------|------|---------------|-----------------------------------------|---------------|-------------|----------|----------|------|---------------|
| Name                                   | Copy number |          |      | Coverage (bp) | Name                                    | Superfamilies | Copy number |          |          |      | Coverage (bp) |
|                                        | Solo-LTR    | Fragment | All  |               |                                         |               | Element     | Solo-LTR | Fragment | All  |               |
| FRetro143                              | 1           | 112      | 113  | 31448         | NRetro143                               | Ty3-gypsy     | 42          | 85       | 341      | 468  | 245282        |
| FRetro144                              | 1           | 46       | 47   | 25766         | NRetro144                               | Ty3-gypsy     | 24          | 14       | 1109     | 1147 | 585867        |
| FRetro146                              | 1           | 100      | 101  | 34792         | NRetro146                               | unclassified  | 9           | 330      | 1003     | 1342 | 2390127       |
| FRetro147                              | 10          | 154      | 164  | 84201         | NRetro147                               | Ty3-gypsy     | 3           | 102      | 3467     | 3572 | 5261482       |
| FRetro149                              | 3           | 9        | 12   | 3216          | NRetro149                               | Ty1-copia     | 9           | 2        | 302      | 313  | 372090        |
| FRetro150                              | 16          | 172      | 168  | 50477         | NRetro150                               | Ty3-gypsy     | 27          | 108      | 713      | 848  | 526232        |
| FRetro151                              | 20          | 803      | 823  | 378278        | NRetro151                               |               |             | 5        | 634      | 639  | 205098        |
| FRetro152                              | 1           | 45       | 46   | 19579         | NRetro152                               |               |             | 13       | 561      | 574  | 430086        |
| FRetro153                              | 4           | 9        | 13   | 4234          | NRetro153                               | Ty1-copia     | 1           |          | 26       | 27   | 16667         |
| FRetro155                              | 2           | 15       | 17   | 4167          | NRetro155                               | Ty1-copia     | 24          | 53       | 233      | 310  | 138149        |
| FRetro156                              | 1           | 9        | 10   | 930           | NRetro156                               | Ty1-copia     | 4           | 2        | 287      | 293  | 296999        |
| FRetro158                              | 4           | 27       | 31   | 11336         | NRetro158                               |               |             | 10       | 48       | 58   | 28955         |
| FRetro159                              | 7           | 214      | 221  | 47875         | NRetro159-houba                         | Ty1-copia     | 147         | 31       | 823      | 1001 | 1644839       |
| FRetro160                              | 1           | 52       | 53   | 20260         | NRetro160                               | Ty3-gypsy     | 1           | 6        | 105      | 112  | 64466         |
| FRetro161                              | 5           | 11       | 16   | 2996          | NRetro161                               | Ty3-gypsy     | 3           |          | 478      | 481  | 124049        |
| FRetro162                              | 10          | 17       | 27   | 12842         | NRetro162                               | Ty1-copia     | 1           | 6        | 37       | 44   | 28868         |
| FRetro163                              | 4           | 39       | 43   | 8106          | NRetro163                               | Ty1-copia     | 8           | 16       | 418      | 442  | 304177        |
| FRetro164                              | 1           | 45       | 46   | 9359          | NRetro164                               | Ty1-copia     | 56          | 15       | 255      | 326  | 709720        |
| FRetro165                              | 7           | 59       | 66   | 12593         | NRetro165                               | Ty1-copia     | 1           |          | 95       | 96   | 36160         |
| FRetro166                              | 1           | 1430     | 1431 | 138249        | NRetro166                               | Ty3-gypsy     | 24          | 225      | 4035     | 4284 | 2959968       |
| FRetro168                              | 5           | 91       | 96   | 43151         | NRetro168                               | Ty1-copia     | 1           | 16       | 1333     | 1350 | 800201        |

|           |     |      |      |         |               |              |     |      |       |       |          |
|-----------|-----|------|------|---------|---------------|--------------|-----|------|-------|-------|----------|
| FRetro170 | 7   | 60   | 67   | 20089   | NRetro170     | Ty3-gypsy    | 18  | 20   | 3266  | 3304  | 1706885  |
| FRetro171 | 5   | 11   | 16   | 2511    | NRetro171     | Ty1-copia    | 1   | 7    | 14    | 22    | 10154    |
| FRetro172 | 2   | 309  | 311  | 101602  | NRetro172     | Ty1-copia    | 3   | 355  | 2367  | 2725  | 2366958  |
| FRetro173 | 20  | 131  | 151  | 91150   | NRetro173     |              |     | 12   | 40    | 52    | 66215    |
| FRetro174 | 19  | 216  | 235  | 154361  | NRetro174     |              |     | 2    | 71    | 73    | 24677    |
| FRetro175 | 1   | 55   | 56   | 19415   | NRetro175-SZ5 | Ty1-copia    | 102 | 282  | 1703  | 2087  | 2692753  |
| FRetro176 | 20  | 222  | 242  | 130743  | NRetro176     |              |     | 4    | 49    | 53    | 32604    |
| FRetro177 | 7   | 33   | 40   | 8173    | NRetro177     | unclassified | 1   | 12   | 31    | 44    | 11433    |
| FRetro178 | 1   | 10   | 11   | 3671    | NRetro178     | Ty1-copia    | 1   |      | 26    | 27    | 17777    |
| FRetro179 | 2   | 20   | 22   | 5188    | NRetro179     | Ty1-copia    | 1   | 9    | 5494  | 5504  | 1262851  |
| FRetro180 | 5   | 21   | 26   | 6274    | NRetro180     | Ty3-gypsy    | 9   | 1    | 1579  | 1589  | 1672733  |
| FRetro181 | 67  | 124  | 191  | 39628   | NRetro181     | Ty1-copia    | 20  | 105  | 340   | 465   | 376793   |
| Total     | 261 | 4671 | 4912 | 1526660 | Total         |              | 541 | 1848 | 31283 | 33672 | 27411315 |

Note: 1. No element was identified from the NRetro151,152,158,173, 174 and 176 families; 2. Each read was counted as one fragment, thus the copy number of the fragments and all the TE families were overestimated, because one TE copy can appear as multiple reads in the RepeatMasker program (<http://www.repeatmasker.org/>).

**Supplementary Table S5 Number of R-genes characterized in *O. brachyantha* and *O. sativa***

| Class      | <i>O.<br/>brachyantha</i> | Tandem | Transpose | <i>O.<br/>sativa</i> | Tandem | Transpose |
|------------|---------------------------|--------|-----------|----------------------|--------|-----------|
| CC-NBS     | 26                        | 13     | 1         | 42                   | 20     | 10        |
| CC-NBS-LRR | 136                       | 83     | 12        | 259                  | 156    | 56        |
| NBS        | 71                        | 25     | 3         | 106                  | 51     | 18        |
| NBS-LRR    | 165                       | 75     | 20        | 249                  | 118    | 72        |
| TIR-NBS    | 1                         | 0      | 0         | 1                    | 0      | 0         |
| Total      | 399                       | 196    | 36        | 657                  | 345    | 156       |



**Supplementary Table S6 Number of pseudogenes characterized in R-genes of *O. brachyantha* and *O. sativa***

|                       | Locus            | Class      | Ortholog         | Note             |
|-----------------------|------------------|------------|------------------|------------------|
| <i>O. brachyantha</i> | Ob01g52420.1     | CC-NBS     | NA               | intact LTR (TSD) |
|                       | NA               | NBS        | LOC_Os02g39884.1 | diverged         |
|                       | Ob04g10550.1     | NBS-LRR    | LOC_Os04g02030.1 | LINE             |
|                       | NA               | NBS        | LOC_Os05g37260.1 | diverged         |
|                       | NA               | NBS        | LOC_Os05g45670.1 | diverged         |
|                       | Ob06g12760.1     | NBS-LRR    | LOC_Os06g05359.1 | intact LTR (TSD) |
|                       | Ob06g33310.1     | NBS        | LOC_Os06g47800.1 | solo LTR         |
|                       | Ob06g34670.1     | NBS        | LOC_Os06g49390.1 | MULE             |
|                       | Ob11g17080.1     | NBS        | LOC_Os11g15670.1 | frameshift       |
|                       | Ob11g24380.1     | CC-NBS-LRR | LOC_Os11g38520.1 | DNA              |
|                       | Ob12g20170.1     | CC-NBS-LRR | LOC_Os12g29710.1 | LTR              |
| <i>O. sativa</i>      | LOC_Os01g71106.2 | CC-NBS     | Ob01g52430.1     | frameshift       |
|                       | LOC_Os06g49360.1 | NBS        | Ob06g34670.1     | intact LTR (TSD) |
|                       | LOC_Os11g15670.1 | NBS        | Ob11g17080.1     | intact LTR (TSD) |
|                       | LOC_Os11g16510.1 | NBS        | Ob11g17240.1     | diverged         |

**Supplementary Table S7 Number of RLK-LRR genes characterized in *O. brachyantha* and *O.****sativa*

| Class      | <i>O.</i><br><i>brachyantha</i> | Tandem | Transpose | <i>O.</i><br><i>sativa</i> | Tandem | Transpose |
|------------|---------------------------------|--------|-----------|----------------------------|--------|-----------|
| LRR-I      | 38                              | 32     | 1         | 52                         | 42     | 3         |
| LRR-II     | 12                              | 3      | 0         | 13                         | 3      | 0         |
| LRR-III    | 37                              | 2      | 0         | 40                         | 1      | 1         |
| LRR-IV     | 3                               | 0      | 0         | 3                          | 0      | 0         |
| LRR-IX     | 3                               | 0      | 0         | 3                          | 0      | 0         |
| LRR-V      | 13                              | 0      | 1         | 12                         | 0      | 0         |
| LRR-VI-1   | 3                               | 1      | 0         | 3                          | 0      | 0         |
| LRR-VI-2   | 12                              | 0      | 3         | 11                         | 0      | 2         |
| LRR-VII    | 9                               | 1      | 0         | 9                          | 1      | 0         |
| LRR-VIII-1 | 10                              | 2      | 1         | 10                         | 2      | 1         |
| LRR-VIII-2 | 34                              | 21     | 0         | 38                         | 24     | 1         |
| LRR-XI     | 43                              | 15     | 1         | 42                         | 18     | 1         |
| LRR-XII    | 72                              | 58     | 5         | 125                        | 88     | 24        |
| LRR-XIIIa  | 3                               | 0      | 0         | 3                          | 0      | 0         |
| LRR-XIIIb  | 3                               | 0      | 0         | 3                          | 0      | 0         |
| LRR-XIV    | 3                               | 1      | 0         | 3                          | 1      | 0         |
| LRR-XV     | 2                               | 0      | 0         | 2                          | 0      | 0         |
| LRR-Xa     | 3                               | 0      | 0         | 3                          | 0      | 0         |
| LRR-Xb     | 31                              | 17     | 0         | 43                         | 30     | 0         |
| LRR_XVI    | 3                               | 0      | 0         | 3                          | 0      | 0         |
| Total      | 337                             | 153    | 12        | 421                        | 210    | 33        |

**Supplementary Table S8 Number of pseudogenes characterized in RLK-LRR genes of *O.***

***brachyantha* and *O. sativa***

|                    | Locus            | Class      | Ortholog         | Note                  |
|--------------------|------------------|------------|------------------|-----------------------|
| <i>O.</i>          | Ob10g14970.1     | LRR-XII    | LOC_Os10g19160.1 | MULE (TSD)            |
| <i>brachyantha</i> | NA               | LRR-XI     | LOC_Os02g12910.1 | frameshift            |
|                    | NA               | LRR-XI     | LOC_Os03g12730.1 | frameshift            |
|                    | Ob10g10640.1     | LRR-Xb     | LOC_Os10g02500.1 | frameshift            |
|                    | Ob10g20010.1     | LRR-XII    | LOC_Os10g32990.1 | frameshift            |
|                    | Ob11g13710.1     | LRR-XII    | LOC_Os11g07160.1 | frameshift            |
|                    | NA               | LRR-XII    | LOC_Os02g30540.1 | frameshift            |
|                    | Ob11g13750.1     | LRR-XII    | NA               | frameshift            |
|                    | <i>O. sativa</i> | NA         | LRR-I            | Ob01g43490.1          |
| LOC_Os04g15630.1   |                  | LRR-XII    | Ob04g13750.1     | intact LTR            |
| LOC_Os11g40810.1   |                  | LRR-XII    | Ob11g25280.1     | intact LTR (TSD)      |
| LOC_Os04g15560.1   |                  | LRR-XII    | Ob04g13680.1     | solo/intact LTR (TSD) |
| LOC_Os06g44430.1   |                  | LRR-VIII-2 | Ob06g30980.1     | DNA                   |
| LOC_Os06g38640.1   |                  | LRR-XII    | NA               | frameshift            |
| LOC_Os06g38730.1   |                  | LRR-XII    | NA               | frameshift            |
| LOC_Os11g40890.1   |                  | LRR-XII    | NA               | frameshift            |
| LOC_Os11g36200.1   |                  | LRR-XII    | NA               | frameshift            |
| LOC_Os11g07124.1   |                  | LRR-XII    | NA               | frameshift            |
| NA                 |                  | LRR-VI-2   | Ob04g29710.1     | frameshift            |

**Supplementary Table S9 Functional enrichment of GO category in tandemly duplicated genes of *O. brachyantha* and *O. sativa***

| Genome                | GO-ID      | <i>P</i> -value | Corrected<br><i>P</i> -value | Annotation                                |
|-----------------------|------------|-----------------|------------------------------|-------------------------------------------|
| <i>O. sativa</i>      | GO:0009607 | 4.70E-05        | 8.71E-04                     | response to biotic stimulus               |
|                       | GO:0007154 | 5.07E-16        | 1.48E-14                     | cell communication                        |
|                       | GO:0048610 | 1.16E-18        | 3.72E-17                     | cellular process involved in reproduction |
|                       | GO:0002252 | 1.70E-04        | 2.07E-03                     | immune effector process                   |
|                       | GO:0008037 | 1.16E-18        | 3.72E-17                     | cell recognition                          |
|                       | GO:0051707 | 2.99E-05        | 5.71E-04                     | response to other organism                |
|                       | GO:0006950 | 3.37E-33        | 3.44E-31                     | response to stress                        |
|                       | GO:0009856 | 1.16E-18        | 3.72E-17                     | pollination                               |
| <i>O. brachyantha</i> | GO:0008219 | 1.31E-52        | 2.01E-50                     | cell death                                |
|                       | GO:0071554 | 8.54E-04        | 3.38E-02                     | cell wall organization or biogenesis      |
|                       | GO:0008219 | 4.21E-05        | 2.69E-03                     | cell death                                |
|                       | GO:0055114 | 7.24E-07        | 1.39E-04                     | oxidation-reduction process               |

**Supplementary Table S10 Expression divergence of inversion-associated duplicated genes**

| Rice<br>MPSS <sup>a</sup> | Os12g40090 | Os12g40120 | Description                                                                                                                     |
|---------------------------|------------|------------|---------------------------------------------------------------------------------------------------------------------------------|
| NGD                       | 0          | 17         | 10 days - Germinating seedlings grown in dark                                                                                   |
| XS06                      | 0          | 4          | Leaves collected from 2 months old Nipponbare Xa21 plants 6hr after Xanthomonas Oryzae inoculation showing susceptible reaction |
| MS48                      | 0          | 7          | Leaves collected from 3 weeks old M.grisea treated Nipponbare at 48hr                                                           |
| -----                     |            |            |                                                                                                                                 |
| Rice<br>MPSS <sup>a</sup> | Os03g21900 | Os03g22060 | Description                                                                                                                     |
| NSL                       | 5          | 0          | Young leaves stressed in 250 mM NaCl for 24h                                                                                    |
| MS03                      | 14         | 0          | Leaves collected from 3 weeks old M.grisea treated Nipponbare at 3hr                                                            |
| MC00                      | 33         | 0          | Leaves collected from 3 weeks old water treated Nipponbare at 0hr                                                               |
| NGD                       | 0          | 2          | 10 days - Germinating seedlings grown in dark                                                                                   |
| NYL                       | 0          | 10         | Young leaves                                                                                                                    |
| NOS                       | 0          | 2          | Ovary and mature stigma                                                                                                         |
| NDR                       | 0          | 36         | Young roots stressed in drought for 5 days                                                                                      |
| XC00                      | 0          | 4          | Leaves collected from 2 months old untreated Control-Nipponbare-Xa21 at 0hr                                                     |
| XR24                      | 0          | 5          | Leaves collected from 2 months old Nipponbare Xa21 plants 24hr after Xanthomonas oryzae                                         |
| XR48                      | 0          | 2          | Leaves collected from 2 months old X.oryzae Nipponbare-Xa21 at 48hr                                                             |
| XS03                      | 0          | 19         | Leaves collected from 2 months old Nipponbare Xa21 plants 3hr after Xanthomonas Oryzae                                          |
| MR24                      | 0          | 1          | Leaves collected from 3 weeks old M.grisea treated Nipponbare-Pi9 at 24hr                                                       |
| MR48                      | 0          | 25         | Leaves collected from 3 weeks old M.grisea treated Nipponbare-Pi9 at 48hr                                                       |
| MS12                      | 0          | 2          | Leaves collected from 3 weeks old M.grisea treated Nipponbare at 12hr                                                           |
| MS48                      | 0          | 2          | Leaves collected from 3 weeks old M.grisea treated Nipponbare at 48hr                                                           |
| PSI                       | 0          | 3          | 6 days old developing seeds from Ilpumbyeo (high taste quality)                                                                 |
| PSN                       | 0          | 6          | 6 days old developing seeds from Nipponbare (control)                                                                           |

|     |   |    |                                                                      |
|-----|---|----|----------------------------------------------------------------------|
| PLC | 0 | 12 | Nipponbare leaves collected 24 hrs after mechanical damage (control) |
|-----|---|----|----------------------------------------------------------------------|

---

<sup>a</sup> Gene expressions of duplicated genes were obtained from Rice MPSS database (<http://mpss.udel.edu>)

**Supplementary Table S11 Identification of non-collinear genes in *O. sativa* and *O.******brachyantha***

|                                      | <i>O. sativa</i> | <i>O. brachyantha</i> |
|--------------------------------------|------------------|-----------------------|
| Protein-coding genes                 | 41404            | 32038                 |
| Genes without synteny status         | 215              | 2484                  |
| Collinear genes                      | 24103            | 22405                 |
| Non-collinear genes                  | 17086            | 7149                  |
| -Not evidence based                  | 7315             | 1736                  |
| --Collinear in grasses               | 76               | 15                    |
| -Evidence based                      | 9771             | 5413                  |
| --Collinear in grasses               | 1213             | 339                   |
| --Evidence based non-collinear genes | 8558             | 5074                  |

**Supplementary Table S12 Sequence signatures of breakpoints of duplicated sequence pairs**

| Acceptor         | Donor          | TSD   | 5'homology | 3'homology | mechanism   | Annotation                                                          |
|------------------|----------------|-------|------------|------------|-------------|---------------------------------------------------------------------|
| LOC_Os01g05770.1 | LOC_Os06g40420 | 15bp  | /          | 8bp        | NHEJ        | expressed protein                                                   |
| LOC_Os01g10160.1 | LOC_Os04g57250 | 8bp   | 5bp        | 0bp        | NHEJ        | latency associated nuclear antigen,putative                         |
| LOC_Os01g10240.1 | LOC_Os07g37530 | 8bp   | /          | /          | TE flanking | urate anion exchanger,putative,expressed                            |
| LOC_Os01g15448.1 | LOC_Os06g08510 | 0bp   | 0bp        | >200bp     | NAHR        | expressed protein (DPL)                                             |
| LOC_Os01g38100.1 | LOC_Os05g49164 | 2bp   | 1bp        | 0bp        | NHEJ        | expressed protein                                                   |
| LOC_Os01g39060.1 | LOC_Os09g21360 | 0bp   | 0bp        | 0bp        | NHEJ        | expressed protein (8-AMINO-7-OXONONANOATE SYNTHASE)                 |
| LOC_Os01g39120.1 | LOC_Os10g32780 | 8bp   | /          | /          | TE/TIR      | RING zinc finger ankyrin protein,putative                           |
| LOC_Os01g42170.1 | LOC_Os09g35530 | (AT)n | (AT)n      | 0bp        | NHEJ        | zinc knuckle family protein                                         |
| LOC_Os01g57250.1 | LOC_Os03g07270 | /     | (AG)3      | (T)5       | NHEJ        | expressed protein                                                   |
| LOC_Os01g65902.1 | LOC_Os10g21290 | 0bp   | 3bp        | 2bp        | NHEJ        | apocytochrome f precursor,putative,expressed                        |
| LOC_Os03g07270.1 | LOC_Os01g57250 | 13bp  | 1bp        | 2bp        | NHEJ        | glycine-rich cell wall protein,putative,expressed                   |
| LOC_Os03g21310.1 | LOC_Os08g33280 | 0bp   | >200 bp    | 0bp        | NAHR        | ulp1 protease family,C-terminal catalytic domain containing protein |
| LOC_Os03g32526.1 | LOC_Os06g20500 | 0bp   | 0bp        | 3bp        | NHEJ        | tRNA-splicing endonuclease positive effector-related,putative       |
| LOC_Os03g52230.1 | LOC_Os10g10580 | 4bp   | 0bp        | 0bp        | TE/TIR      | dynammin-2B,putative                                                |
| LOC_Os04g06350.1 | LOC_Os02g05320 |       |            |            | NHEJ        | ANKYRIN REPEAT                                                      |
| LOC_Os04g09790.1 | LOC_Os12g36960 | 0bp   | 0bp        | 2bp        | TE flanking | spidroin-1,putative                                                 |
| LOC_Os04g38914.1 | LOC_Os03g60639 | 0bp   | 1bp        | 2bp        | NHEJ        | expressed protein                                                   |
| LOC_Os04g54890.1 | LOC_Os01g63040 |       |            |            | NHEJ        |                                                                     |
| LOC_Os04g57250.1 | LOC_Os01g10160 | 10bp  | 3bp        | 0bp        | NHEJ        | latency associated nuclear antigen,putative                         |
| LOC_Os05g01675.1 | LOC_Os04g16760 | 0bp   | 0bp        | 3bp        | NHEJ        | photosystem I P700 chlorophyll a apoprotein A1,putative             |
| LOC_Os05g03810.1 | LOC_Os12g32130 | 8bp   | 0bp        | 2bp        | NHEJ        | trehalose phosphatase,putative                                      |
| LOC_Os05g10570.1 | LOC_Os07g15980 | 0bp   | 4bp        | 3bp        | NHEJ        | expressed protein                                                   |
| LOC_Os05g22712.1 | LOC_Os10g21332 |       |            |            |             | chloroplast S ribosomal protein S11,putative                        |
| LOC_Os05g22716.1 | LOC_Os10g21336 |       |            |            |             | translation initiation factor IF-1,chloroplast,putative             |
| LOC_Os05g22718.1 | LOC_Os10g21338 | 0bp   | 3bp        | /          | NHEJ        | chloroplast S ribosomal protein S8,putative                         |
| LOC_Os05g22722.1 | LOC_Os10g21342 |       |            |            |             | chloroplast S ribosomal protein L14,putative                        |
| LOC_Os05g22724.1 | LOC_Os10g21344 |       |            |            |             | chloroplast S ribosomal protein L16,putative                        |



|                  |                |       |     |       |             |                                                                     |
|------------------|----------------|-------|-----|-------|-------------|---------------------------------------------------------------------|
| LOC_Os05g50650.1 | LOC_Os01g55010 | 11bp  | 0bp | 1bp   | TE/TIR      | ligA,putative,expressed                                             |
| LOC_Os06g06970.1 | LOC_Os08g43200 | 7bp   | /   | /     | TE flanking | AP2 domain containing protein,expressed                             |
| LOC_Os06g13780.1 | LOC_Os04g32610 | 0bp   | 2bp | 0bp   | NHEJ        | expressed protein                                                   |
| LOC_Os06g39700.1 | LOC_Os10g21328 |       |     |       |             | DNA-directed RNA polymerase subunit alpha,putative                  |
| LOC_Os06g39704.1 | LOC_Os10g21322 |       |     |       |             | photosystem II reaction center protein H,putative                   |
| LOC_Os06g39708.1 | LOC_Os10g21310 |       |     |       |             | photosystem II P680 chlorophyll A apoprotein,putative               |
| LOC_Os06g39712.1 | LOC_Os10g21300 |       |     |       |             | OsClp10 - Putative Clp protease homologue,expressed                 |
| LOC_Os06g39716.1 | LOC_Os10g21314 |       |     |       |             | chloroplast S ribosomal protein S18,putative,expressed              |
| LOC_Os06g39718.1 | LOC_Os10g21312 |       |     |       |             | chloroplast S ribosomal protein L33,putative,expressed              |
| LOC_Os06g39722.1 | LOC_Os10g21306 | 0bp   | 0bp | /     | NHEJ        | expressed protein                                                   |
| LOC_Os06g39728.1 | LOC_Os10g21298 |       |     |       |             | cytochrome b559 subunit alpha,putative                              |
| LOC_Os06g39738.1 | LOC_Os10g21290 |       |     |       |             | apocytochrome f precursor,putative                                  |
| LOC_Os06g39740.1 | LOC_Os10g21266 |       |     |       |             | ATP synthase subunit beta,putative                                  |
| LOC_Os06g39744.1 | LOC_Os10g21282 |       |     |       |             | photosystem I assembly protein ycf4,putative                        |
| LOC_Os06g39754.1 | LOC_Os10g21268 |       |     |       |             | expressed protein                                                   |
| LOC_Os06g39756.1 | LOC_Os10g21264 |       |     |       |             | ATP synthase epsilon chain,putative                                 |
| LOC_Os07g14470.1 | LOC_Os10g01410 | 0bp   | /   | 2bp   | NHEJ        | OsWAK67 - OsWAK short gene                                          |
| LOC_Os07g14490.1 | LOC_Os10g01390 |       |     |       |             | OsWAK68 - OsWAK pseudogene                                          |
| LOC_Os07g20170.1 | LOC_Os10g37670 | 0bp   | /   | 90bp  | NAHR        | actin-depolymerizing factor,putative                                |
| LOC_Os07g22504.1 | LOC_Os06g46435 | 0bp   | /   | 2bp   | NHEJ        | NADPH-dependent oxidoreductase,putative                             |
| LOC_Os07g23810.1 | LOC_Os10g29240 | 0bp   | /   | 1bp   | NHEJ        | expressed protein                                                   |
| LOC_Os07g29440.1 | LOC_Os01g10940 | 200bp | 3bp | 160bp | TE/TIR      | S-adenosylmethionine synthetase ,putative                           |
| LOC_Os07g37780.1 | LOC_Os04g52354 | 6bp   | 3bp | 2bp   | NHEJ        | ribosomal protein S17,putative                                      |
| LOC_Os07g37790.1 | LOC_Os04g52340 |       |     |       |             | expressed protein (Cell differentiation protein rcd1)               |
| LOC_Os08g23280.1 | LOC_Os06g06310 | 0bp   | /   | /     | TE flanking | expressed protein (Porin-like)                                      |
| LOC_Os08g24160.1 | LOC_Os06g49760 | 9bp   | /   | /     | NHEJ        | invertase/pectin methylesterase inhibitor family protein,putative   |
| LOC_Os08g28200.1 | LOC_Os09g36690 | 0bp   | 3bp | 0bp   | NHEJ        | expressed protein (Ankyrin repeat)                                  |
| LOC_Os08g33280.1 | LOC_Os08g40300 | 9bp   | 3bp | 3bp   | NHEJ        | ulp1 protease family,C-terminal catalytic domain containing protein |
| LOC_Os08g39580.1 | LOC_Os01g42170 | (AT)n | /   | /     | NHEJ        | zinc knuckle family protein                                         |

|                  |                    |       |     |     |             |                                                                     |
|------------------|--------------------|-------|-----|-----|-------------|---------------------------------------------------------------------|
| LOC_Os08g40300.1 | LOC_Os08g33280     | 0bp   | 3bp | 3bp | NHEJ        | expressed protein                                                   |
| LOC_Os09g04680.1 | LOC_Os10g21310     | 140bp | 5bp | 4bp | NHEJ        | photosystem II P680 chlorophyll A apoprotein,putative               |
| LOC_Os09g11850.1 | LOC_Os04g25120     | 9bp   | 0bp | 0bp | NHEJ        | ulp1 protease family,C-terminal catalytic domain containing protein |
| LOC_Os09g11860.1 | LOC_Os04g25110     |       |     |     |             | ulp1 protease family,C-terminal catalytic domain containing protein |
| LOC_Os09g14570.1 | LOC_Os03g38700     | 0bp   | 0bp | 3bp | NHEJ        | tropinone reductase,putative                                        |
| LOC_Os09g14590.1 | LOC_Os03g38720     |       |     |     |             | proteasome maturation factor UMP1 family protein                    |
| LOC_Os09g14600.1 | LOC_Os03g38730     |       |     |     |             | peroxisomal membrane protein-related,putative,expressed             |
| LOC_Os09g14610.1 | LOC_Os03g38740     |       |     |     |             | DCL2,putative,expressed                                             |
| LOC_Os09g14614.1 | LOC_Os03g38745     | 1.3kb | /   | 4bp | NHEJ        | serine/arginine repetitive matrix protein ,putative,expressed       |
| LOC_Os09g24402.1 | LOC_Os10g21358     |       |     |     |             | chloroplast S ribosomal protein L23,putative                        |
| LOC_Os09g24404.1 | LOC_Os10g21354     |       |     |     |             | chloroplast S ribosomal protein L2,putative                         |
| LOC_Os09g24406.1 | LOC_Os10g21356     |       |     |     |             | uncharacterized protein ycf72,putative                              |
| LOC_Os09g24412.1 | LOC_Os10g21352     |       |     |     |             | chloroplast S ribosomal protein S19,putative                        |
| LOC_Os09g24414.1 | LOC_Os10g21348     |       |     |     |             | chloroplast S ribosomal protein L22,putative                        |
| LOC_Os09g24416.1 | LOC_Os10g21344     |       |     |     |             | chloroplast S ribosomal protein S3,putative                         |
| LOC_Os09g27970.1 | LOC_Os12g13290     |       |     |     |             | 0bp                                                                 |
| LOC_Os09g36690.1 | LOC_Os08g28200     | 0bp   | /   | 2bp | NHEJ        | expressed protein (ANKYRIN REPEAT)                                  |
| LOC_Os10g05900.1 | LOC_Os02g05140-130 | 0bp   | /   | /   | unknown     | expressed protein                                                   |
| LOC_Os10g12300.1 | LOC_Os06g42060     | 1bp   | 3bp | 5bp | NHEJ        | expressed protein                                                   |
| LOC_Os10g22630.1 | LOC_Os03g55750     | 0bp   | /   | 2bp | NHEJ        | expressed protein                                                   |
| LOC_Os10g24954.1 | LOC_Os02g27830     | 0bp   | /   | /   | unknown     | ulp1 protease family,C-terminal catalytic domain containing protein |
| LOC_Os10g31360.1 | LOC_Os08g35980     | 0bp   | /   | /   | TE/TIR      | GRF zinc finger family protein,expressed                            |
| LOC_Os10g31650.1 | LOC_Os03g47530     | 0bp   | /   | /   | TE flanking | glycosyl transferase domain containing protein,putative             |
| LOC_Os11g05630.1 | LOC_Os04g08170     | 10bp  | 2bp | 4bp | TE/TIR      | CBL-interacting protein kinase,putative                             |
| LOC_Os11g09979.1 | LOC_Os04g26330     | 0bp   | 3bp | 0bp | NHEJ        | expressed protein                                                   |
| LOC_Os11g12500.1 | LOC_Os09g08450     | 0bp   | /   | 2bp | NHEJ        | ulp1 protease family,C-terminal catalytic domain containing protein |
| LOC_Os11g38600.1 | LOC_Os04g48700     | 0bp   | 4bp | 4bp | NHEJ        | TruB family pseudouridylate synthase,putative                       |
| LOC_Os12g10570.1 | LOC_Os10g21266     | 2kb   | 4bp | /   | NHEJ        | ATP synthase subunit beta,putative                                  |
| LOC_Os12g10580.1 | LOC_Os10g21268     |       |     |     |             | ribulose bisphosphate carboxylase large chain precursor,putative    |

|                  |                |      |     |     |        |                                                       |
|------------------|----------------|------|-----|-----|--------|-------------------------------------------------------|
| LOC_Os12g10590.1 | LOC_Os10g21300 |      |     |     |        | OsClp13 - Putative Clp protease homologue             |
| LOC_Os12g10600.1 | LOC_Os10g21310 |      |     |     |        | photosystem II P680 chlorophyll A apoprotein,putative |
| LOC_Os12g19420.1 | LOC_Os01g58022 | 2bp  | 4bp | /   | NHEJ   | ubiquinone oxidoreductase,putative                    |
| LOC_Os12g19430.1 | LOC_Os01g58000 |      |     |     |        | ATP synthase epsilon chain,putative                   |
| LOC_Os12g28520.1 | LOC_Os09g28860 | 10bp | 0bp | 0bp | TE/TIR | abscisic acid-inducible,putative                      |

**Supplementary Table S13 Sequence coverage evaluated by comparison with BAC clones sequenced by Sanger technology and Roche 454**

| BAC                         | Length  | Coverage | DNA<br>TE | Percent% | LOSS  | Percent% | RNA<br>TE | Percent% | LOSS   | Percent% | GENE<br>NUM | LOSS | Percent% | GENE<br>LEN | LOSS  | Percent% |
|-----------------------------|---------|----------|-----------|----------|-------|----------|-----------|----------|--------|----------|-------------|------|----------|-------------|-------|----------|
| Euchromatin                 | 2698297 | 97%      | 605535    | 22%      | 19523 | 3.20%    | 168508    | 6%       | 10977  | 6.50%    | 301         | 16   | 5.30%    | 386147      | 41837 | 10.83%   |
| a0061N13                    | 125279  | 98%      | 43365     | 35%      | 885   | 2.00%    | 17068     | 14%      | 140    | 0.80%    | 6           | 0    | 0.00%    | 11877       | 1     | 0.00%    |
| a0063A14                    | 169028  | 100%     | 37411     | 22%      | 156   | 0.40%    | 38484     | 23%      | 726    | 1.90%    | 7           | 0    | 0.00%    | 12501       | 26    | 0.20%    |
| a0066D17                    | 161657  | 98%      | 50075     | 31%      | 800   | 1.60%    | 22312     | 14%      | 385    | 1.70%    | 11          | 0    | 0.00%    | 17118       | 1     | 0.00%    |
| DQ810282                    | 246961  | 95%      | 42009     | 17%      | 525   | 1.20%    | 2809      | 1%       | 5      | 0.20%    | 36          | 0    | 0.00%    | 40955       | 4893  | 11.90%   |
| FJ032639                    | 183535  | 96%      | 38441     | 21%      | 809   | 2.10%    | 2385      | 1%       | 3      | 0.10%    | 20          | 1    | 5.00%    | 28578       | 3208  | 11.20%   |
| FJ266021                    | 213323  | 99%      | 42877     | 20%      | 379   | 0.90%    | 21000     | 10%      | 31     | 0.10%    | 20          | 0    | 0.00%    | 37908       | 451   | 1.20%    |
| FQ378032                    | 857171  | 94%      | 173957    | 20%      | 11982 | 6.90%    | 31001     | 4%       | 3945   | 12.70%   | 116         | 11   | 9.50%    | 135723      | 17332 | 12.80%   |
| FQ378033                    | 628490  | 94%      | 155127    | 25%      | 3878  | 2.50%    | 25360     | 4%       | 2475   | 9.80%    | 74          | 4    | 5.40%    | 85452       | 15042 | 17.60%   |
| GQ407207                    | 112853  | 96%      | 22273     | 20%      | 109   | 0.50%    | 8089      | 7%       | 3267   | 40.40%   | 11          | 0    | 0.00%    | 16035       | 883   | 5.50%    |
| Pericentromere <sup>a</sup> | 1041915 | 80%      | 229217    | 22%      | 38347 | 16.73%   | 475360    | 46%      | 161162 | 33.90%   | 46          | 1    | 2.17%    | 46950       | 3277  | 6.98%    |
| a0003N12                    | 146708  | 87%      | 29647     | 20%      | 3308  | 11.20%   | 63034     | 43%      | 13265  | 21.00%   | 7           | 0    | 0.00%    | 5829        | 61    | 1.00%    |
| a0008B23                    | 147522  | 93%      | 34252     | 23%      | 1826  | 5.30%    | 34955     | 24%      | 3615   | 10.30%   | 11          | 0    | 0.00%    | 10377       | 5     | 0.00%    |
| a0025L07                    | 184702  | 79%      | 43256     | 23%      | 9088  | 21.00%   | 72256     | 39%      | 29467  | 40.80%   | 9           | 0    | 0.00%    | 9549        | 125   | 1.30%    |
| a0073D22                    | 142790  | 75%      | 46589     | 33%      | 5546  | 11.90%   | 72569     | 51%      | 31435  | 43.30%   | 6           | 0    | 0.00%    | 3039        | 82    | 2.70%    |
| a0079B10                    | 126061  | 61%      | 12714     | 10%      | 1357  | 10.70%   | 75016     | 60%      | 38005  | 50.70%   | 4           | 1    | 25.00%   | 8520        | 2464  | 28.90%   |
| a0094J22                    | 163153  | 87%      | 33450     | 21%      | 9418  | 28.20%   | 86104     | 53%      | 16786  | 19.50%   | 5           | 0    | 0.00%    | 5760        | 194   | 3.40%    |
| a0095J07                    | 130979  | 75%      | 29309     | 22%      | 7804  | 26.60%   | 71426     | 55%      | 28589  | 40.00%   | 4           | 0    | 0.00%    | 3876        | 346   | 8.90%    |

<sup>a</sup>These seven clones were overlapping BAC clones located on chromosome 8. This region is orthologous to the centromeric region of rice chromosome 8 and covers the centromere of chromosome 8 in *O. brachyantha*. These BAC clones were sequenced by Sanger dye-terminator chemistry (unpublished data from Dr. Jiming Jiang & Dr. Rod Wing)

**Supplementary Table S14 Evidences used in gene prediction**

| Evidence             | Rice<br>(Tigr6.1; RAP3) | <i>Brachypodium</i><br>(v1) | <i>Sorghum</i><br>(v1.4) | Maize<br>(v5b) | <i>Poplar</i><br>(v2.0) | <i>Arabidopsis</i><br>(TAIR9) | Total               |
|----------------------|-------------------------|-----------------------------|--------------------------|----------------|-------------------------|-------------------------------|---------------------|
| Protein              | 51729; 50318            | 32255                       | 34496                    | 63540          | 45778                   | 33410                         | 311526              |
| cDNA                 | 54970                   | -                           | -                        | 38869          | -                       | -                             | 109017 <sup>a</sup> |
| EST                  | 1226650                 | -                           | -                        | -              | -                       | -                             | 1226650             |
| RNAseq<br>transcript | 92349                   | -                           | -                        | -              | -                       | -                             | 92349               |

<sup>a</sup> including 15178 other monocot cDNAs

**Supplementary Table S15 Exonerate parameters used in gene prediction**

| Evidence           | Model          | Coverage (%) | Identity (%) |
|--------------------|----------------|--------------|--------------|
| Protein            | protein2genome | 20           | 30           |
| rice cDNA          | est2genome     | 30           | 50           |
| other cDNA         | coding2genome  | 20           | 30           |
| EST                | est2genome     | 30           | 50           |
| RNAseq transcripts | est2genome     | 80           | 90           |

**Supplementary Table S16 Gene statistical data from selected grass species**

|               | <i>Oryza brachyantha</i><br>(v1.4) | <i>O. sativa</i><br>(TIGR6.1) | <i>O. sativa</i><br>(RAP3) | <i>Brachypodium</i><br>(v1.0) | <i>Sorghum</i> (v1.4) |
|---------------|------------------------------------|-------------------------------|----------------------------|-------------------------------|-----------------------|
| Gene Number   | 32038                              | 41404                         | 33265                      | 25532                         | 34496                 |
| Gene Length   | 2629/1873                          | 2774/2093                     | 3024/2422                  | 3336/2643                     | 2850/2038             |
| Gene GC       | 0.49/0.45                          | 0.50/0.47                     | 0.49/0.46                  | 0.50/0.47                     | 0.50/0.47             |
| Coding GC     | 0.55/0.53                          | 0.57/0.57                     | 0.57/0.57                  | 0.56/0.55                     | 0.56/0.54             |
| Coding Length | 1087/855                           | 1041/819                      | 1004/828                   | 1300/1101                     | 1159/987              |
| Exon Number   | 4.7/3.0                            | 4.1/2.0                       | 3.9/2.0                    | 5.2/3.0                       | 4.3/3.0               |
| Exon Length   | 230/131                            | 253/136                       | 260/140                    | 250/134                       | 270/143               |
| Exon GC       | 0.50/0.47                          | 0.51/0.48                     | 0.51/0.48                  | 0.51/0.47                     | 0.51/0.48             |
| Intron Length | 416/164                            | 407/173                       | 412/150                    | 397/155                       | 444/145               |
| Intron GC     | 0.38/0.36                          | 0.37/0.36                     | 0.37/0.35                  | 0.38/0.37                     | 0.38/0.37             |
| Single Exon   | 8110                               | 11201                         | 12134                      | 5690                          | 9357                  |

**Supplementary Table S17 Comparison of the gene prediction with the published data**

| Query ID | Hit ID       | Length | Coverage | Identity | Query Annotation                                                  |
|----------|--------------|--------|----------|----------|-------------------------------------------------------------------|
| Adh1.1   | Ob11g15170.1 | 3723   | 0.88     | 1.00     | NBS-LRR disease resistance protein family-1                       |
| Adh1.10  | Ob11g15050.1 | 282    | 0.98     | 1.00     | expressed protein-RZ53 family-2                                   |
| Adh1.11  | Ob11g15040.1 | 1008   | 1.00     | 1.00     | peroxidase                                                        |
| Adh1.12  | Ob11g15030.1 | 1215   | 0.65     | 0.99     | NifS-like protein                                                 |
| Adh1.13  | Ob11g15020.1 | 1839   | 1        | 1.00     | phosphatidylinositol kinase                                       |
| Adh1.14  | Ob11g15010.1 | 2481   | 1.00     | 1.00     | S-domain receptor-like protein kinase                             |
| Adh1.15  | Ob11g14990.1 | 1335   | 1.00     | 1.00     | F-box family-1                                                    |
| Adh1.16  | Ob11g14970.1 | 909    | 0.79     | 0.98     | expressed protein                                                 |
| Adh1.17  | Ob11g14950.1 | 344    | 0.47     | 1.00     | F-box family-2                                                    |
| Adh1.18  | Ob11g14940.1 | 1164   | 1.00     | 1.00     | flavin monooxygenase family-1                                     |
| Adh1.19  | Ob11g14930.1 | 1044   | 1.00     | 1.00     | flavin monooxygenase family-2                                     |
| Adh1.2   | Ob11g15140.1 | 2003   | 0.97     | 0.99     | protein kinase domain containing protein                          |
| Adh1.20  | Ob11g14920.1 | 277    | 0.33     | 1.00     | myb-like DNA-binding domain containing protein                    |
| Adh1.3   | Ob11g15130.1 | 3894   | 1.00     | 0.99     | NBS-LRR disease resistance protein family-2                       |
| Adh1.4   | Ob11g15120.1 | 2802   | 0.65     | 1.00     | NBS-LRR disease resistance protein family-3                       |
| Adh1.5   | Ob11g15100.1 | 4058   | 0.93     | 1.00     | NBS-LRR disease resistance protein family-4                       |
| Adh1.6   | Ob11g15090.1 | 1143   | 1.00     | 0.99     | alcohol dehydrogenase family-3                                    |
| Adh1.7   | Ob11g15080.1 | 1140   | 1.00     | 0.99     | alcohol dehydrogenase family-2                                    |
| Adh1.8   | Ob11g15070.1 | 923    | 0.81     | 1.00     | alcohol dehydrogenase family-1                                    |
| Adh1.9   | Ob11g15060.1 | 291    | 1.00     | 1.00     | expressed protein-RZ53 family-1                                   |
| Hd1.1    | Ob06g19700.1 | 453    | 1.00     | 1.00     | putative nucleolar protein family a member 2                      |
| Hd1.10   | Ob06g19850.1 | 1350   | 1.00     | 1.00     | putative Na <sup>+</sup> dependent neutral amino acid transporter |
| Hd1.11   | Ob06g19870.1 | 2307   | 1.00     | 0.99     | putative adaptor protein kanadaplin                               |
| Hd1.2    | Ob06g19710.1 | 651    | 1.00     | 1.00     | putative somatic embryogenesis receptor kinase 1                  |
| Hd1.3    | Ob06g19720.1 | 261    | 1.00     | 1.00     | hypothetical protein                                              |
| Hd1.4    | Ob06g19740.1 | 1171   | 0.61     | 1.00     | putative somatic embryogenesis protein kinase 1                   |
| Hd1.5    | Ob06g19760.1 | 1011   | 1.00     | 1.00     | putative peroxidase 49 precursor                                  |
| Hd1.6    | Ob06g19770.1 | 666    | 0.56     | 1.00     | putative heading date 1 protein                                   |
| Hd1.7    | Ob06g19800.1 | 2682   | 1.00     | 1.00     | putative polycomb protein EZ1                                     |
| Hd1.8    | Ob06g19820.1 | 1281   | 1.00     | 0.98     | putative TA1 protein                                              |
| Hd1.9    | Ob06g19830.1 | 2565   | 0.87     | 1.00     | putative armadillo/beta-catenin repeat related protein            |
| Moc1.1   | Ob06g28430.1 | 2977   | 1.00     | 1.00     | U5 small nuclear ribonucleoprotein component                      |
| Moc1.10  | Ob06g28570.1 | 1212   | 0.68     | 1.00     | unknown                                                           |
| Moc1.11  | Ob06g28590.1 | 528    | 0.61     | 1.00     | unknown                                                           |
| Moc1.12  | Ob06g28600.1 | 247    | 0.19     | 0.99     | Monoculm1                                                         |
| Moc1.13  | Ob06g28610.1 | 1254   | 1.00     | 1.00     | Mlo family protein                                                |
| Moc1.14  | Ob06g28620.1 | 712    | 0.82     | 0.99     | aspartic proteinase nepenthesin-1 precursor                       |
| Moc1.15  | Ob06g28630.1 | 1743   | 1.00     | 1.00     | microtubule-associated protein MAP65-1a                           |
| Moc1.16  | Ob06g28640.1 | 190    | 0.46     | 0.95     | IQ calmodulin-binding motif family protein                        |
| Moc1.17  | Ob06g28660.1 | 1527   | 0.81     | 1.00     | EMB2261 putative                                                  |
| Moc1.18  | Ob06g28680.1 | 1218   | 1.00     | 1.00     | polygalacturonase precursor                                       |
| Moc1.19  | Ob06g28690.1 | 1210   | 1.00     | 1.00     | exopolygalacturonase precursor                                    |
| Moc1.2   | Ob06g28440.1 | 666    | 1.00     | 1.00     | charged multivesicular body protein 4b                            |
| Moc1.20  | Ob06g28700.1 | 3396   | 0.99     | 1.00     | putative RNA polymerase A(I) large subunit                        |



|        |              |      |      |      |                                                    |
|--------|--------------|------|------|------|----------------------------------------------------|
| Moc1.3 | Ob06g28450.1 | 580  | 0.84 | 1.00 | putative SFT2 protein                              |
| Moc1.4 | Ob06g28450.1 | 955  | 0.97 | 1.00 | fructose-bisphosphate aldolase cytoplasmic isozyme |
| Moc1.5 | Ob06g28460.1 | 1038 | 1    | 0.99 | copine-1                                           |
| Moc1.6 | Ob06g28530.1 | 920  | 0.39 | 0.99 | subtilisin-like protease precursor                 |
| Moc1.7 | Ob06g28530.1 | 966  | 1.00 | 1.00 | ZAC                                                |
| Moc1.8 | Ob06g28540.1 | 999  | 1.00 | 1.00 | MYB-CC type transfactor                            |
| Moc1.9 | Ob06g28560.1 | 1509 | 1.00 | 1.00 | unknown                                            |

---

**Supplementary Table S18 Determination of orthologous genes in *O. brachyantha* for the collected genes of *O. sativa***

|                  | Total Gene | Ortholog | Miss Gene |
|------------------|------------|----------|-----------|
| Flower pathway   | 96         | 93       | 3         |
| Starch pathway   | 15         | 14       | 1         |
| Agriculture gene | 30         | 25       | 5         |
| Total            | 141        | 132      | 9         |

**Supplementary Table S19 Orthologous genes not found by the automatic strategy**

| Gene ID        | Name   | Position | Ortholog     | Note                           |
|----------------|--------|----------|--------------|--------------------------------|
| LOC_Os01g11940 | OsFTL1 | 6493516  | Ob01g17510.1 | fine                           |
| LOC_Os03g42900 | OsFLKb | 23923751 |              | have ortholog in maize/sorghum |
| LOC_Os10g41100 | OsP    | 21998104 | Ob10g25540.1 | sequence gap                   |
| LOC_Os01g44220 | AGPIs  | 25352725 |              | miss in prediction             |
| LOC_Os03g29380 | GS3    | 16728081 | Ob03g30090.1 | incorrect prediction in rice   |
| LOC_Os07g47330 | FZP    | 28298599 | Ob07g31130.1 | sequence gap                   |
| LOC_Os05g09520 | qSW5   | 5365100  | Ob05g15380.1 | sequence gap                   |
| LOC_Os06g40780 | MOC1   | 24310311 | Ob06g28600.1 | sequence gap                   |
| LOC_Os04g57530 | sh4    | 34046082 | Ob04g36080.1 | sequence gap                   |

## Supplementary Note

### Supplementary Note 1. Divergence time between *O. brachyantha* and *O. sativa* (rice)

The divergence time of *Oryza* species was initially estimated to be at ~9 million years ago (MYA)<sup>66</sup>. However, two recent studies suggested older divergence time for the split of *Oryza* species (14 MYA<sup>67</sup> or 15 MYA<sup>62</sup>) using more sequences and/or more reasonable approaches. Phylogenetic analysis using 142 gene fragments placed *O. brachyantha* between the basal lineage G-genome and the other genome types, although the authors indicated that the divergence of F-genome and G-genome from the rest of *Oryza* genome was rapid and being the first diversification in the genus *Oryza*<sup>61</sup>. Therefore, the divergence time between *O. brachyantha* and rice should be consistent with the split of *Oryza* species at ~15 MYA.

# Supplementary Methods

## The plant materials and background

**Sequencing materials.** *Oryza brachyantha* A. Chev. et Roehr. is an annual diploid wild rice distributed in central African. It grows in an open habitat, with slender culms highly branched. It is the only species assigned to the F genome type. This wild rice possesses potential useful traits for rice breeding, such as resistance to yellow stem borer, leaf-folder, whorl maggot and bacterial blight (BB)<sup>68</sup>. The material used for genome sequencing is the same accession (IRGC101232) as used for the BAC library construction in the *Oryza* Map Alignment Project (OMAP). The plants were kindly provided by Dr. Dashan Brar of the International Rice Research Institute (IRRI). Young leaves from a few plants were harvested to reduce heterozygosity.

**Genome size estimation of *O. brachyantha*.** The genome size of *O. brachyantha* was estimated to be 342 Mb<sup>69</sup> or 362 Mb<sup>70</sup> using flow cytometry. The genome sequencing project of *O. brachyantha* allows us to give a more accurate estimate of the genome size. Firstly, we employed K-mer depth distribution of sequence reads to estimate the genome size<sup>71</sup>. A total of 166 million reads from small libraries (200-500 bp insertion size) were analyzed to exact 17 K-mer. We obtained 11,330 million of 17 K-mer with the peak of depth at 38, which lead to the estimation of genome size to be ~ 298 Mb (11,330/38). Secondly, we used the integrated BAC-based physical map with the sequence assembly to estimate the genome size, which is the total number of bands covered by the physical map (total CB units) multiplied by the average band size (CB unit size)<sup>72</sup>. The CB unit size was calculated to be 1.38 kb/CB unit by calculating 83 non-overlapping BAC-based fingerprinted contigs covered by a single scaffold sequence (mean contig size = 568.4 CB unit, mean sequence size = 777.6 kb). This leads to an estimation of the genome size to be ~ 297 Mb (Total CB unit × CB unit size = 215,208 × 1.38).

## Genome sequencing and assembly

**Genome sequencing.** Nuclear DNA of *O. brachyantha* was isolated from young leaves using a modified CTAB protocol, followed by purification using phenol-chloroform. The genomic DNA was fragmented into different sizes to prepare pair-end libraries using standard Illumina protocols. Sequencing was performed on an Illumina Genome Analyzer II. We generated more than 30 Gb of clean sequence data, which is ~ 104-fold coverage of the genome of *O. brachyantha*. The BAC library of *O. brachyantha* was constructed at Arizona Genomics Institute<sup>70</sup>. BAC end sequences (BES) were obtained from the *Oryza* Map Alignment Project (OMAP, [www.omap.org](http://www.omap.org))<sup>73</sup>. The details on the libraries and sequence coverage are provided in Supplementary Table S1.

**Genome assembly.** The sequence assembly was performed with SOAPdenovo<sup>74</sup> at Beijing Genomics Institute at Shenzhen (BGI). We used only reads from a small insert size library (< 2,000 bp) to assemble the contigs. These 60-fold sequences were assembled into contigs with an N50 of 1.5 kb. Scaffolds were constructed by adding pair-end mapping reads step by step, ranging from small insertion size libraries to large insertion size libraries. The gaps in the scaffolds were filled by *de novo* assembly of the reads covering the gap regions. The assembly, which was solely based on short reads, produced a genome of 262 Mb with a contig N50 of 20.4 kb and a scaffold N50 of 1 Mb. The scaffold N50 was further improved to 1.6 Mb by adding the BAC end sequences to the scaffold reconstruction. The final assembly,

which is referred to as the “super-scaffold” in Supplementary Table S2, contains 654 super-scaffolds longer than 2 kb, with the longest one reaching 8.8 Mb.

**Anchoring the scaffolds onto chromosomes.** By integration with the BAC-based physical map, we further promoted the super-scaffold sequences into 36 “big-scaffold” sequences which made up 96% of the total assembly (Fig. 1). These big-scaffold sequences were mapped onto chromosomes based on the gene collinearity in the genus *Oryza* and confirmed with FISH experiments (Supplementary Fig. S3). The unmapped sequences are made up of 4% of the genome and contain 661 predicted gene models.

**Evaluation of the accuracy of the sequence assembly.** The super-scaffold sequences were integrated with the physical map of *O. brachyantha* to validate the assembly and make further scaffolding<sup>75</sup>. We identified and confirmed nine inconsistencies between the sequence assembly and the physical map (Supplementary Fig. S23). We also compared the assembled sequence with 14 BAC sequences and two large sequence segments that generated by Sanger technology and Roche 454 (9 located in the euchromatic regions and 7 located in the pericentromeric regions. Examples of comparisons were shown in Supplementary Fig. S24). Higher sequence coverage in the euchromatic regions (97%) and lower coverage in the pericentromeric regions (80%) were observed. The sequence coverage is ranging from 61% to 93% in the pericentromeric regions depending on the proportion of LTR retrotransposons (Supplementary Table S13). In the two large sequence segments compared (FQ378032 and FQ378033)<sup>76</sup>, although the overall coverage is high (94%), one large sequence gap in each sequence was found to be caused by an unanchored super-scaffold (Supplementary Figs S25 and S26). Considering that we have ~ 661 gene models in the unanchored super-scaffolds, we incorporated the collinear genes on super-scaffolds into synteny analysis by comparing the super-scaffolds with the rice genome using MCscan<sup>77</sup> (Method). This will make the influence of assemble artifacts minimal.

## Gene prediction and evaluation

**Evidence-based gene prediction.** We employed Gramene GeneBuilder<sup>78</sup> to predict gene models in *O. brachyantha*. The data of the proteins and transcripts were aligned with the soft-masked genome sequence by Exonerate<sup>79</sup>, using different model and filter stringency (Supplementary Table S14 and Supplementary Table S15). For each line of evidence, a set of gene models was constructed using Gramene GeneBuilder<sup>78</sup>. Gene models were also predicted on the soft-masked genome sequence by *ab initio* tool FGENESH (<http://linux1.softberry.com>). The final gene models were obtained by combining these gene models using Gramene GeneBuilder<sup>78</sup>. After filtering pseudogenes and short gene models within introns of other genes, 31,601 protein-coding gene models were obtained, including 39,680 transcripts. Another 8,470 FGENESH gene models that did not overlap with the current gene models were also included. We selected a single best transcript for each locus to represent a gene model. Transposable element-related gene models were filtered out if more than 70% of the coding sequences were overlapped with the transposable elements. Species-specific genes were filtered out if they did not have evidence support or code for short proteins ( $\leq 50$  amino acids). The final gene prediction includes 32,038 protein-coding gene models, of which 25,546 (80%) genes have homologous proteins in plant genomes or assignment with a Pfam domain annotation; 4,014 (13%) genes are solely supported by RNA-seq evidence and 2,478 genes have no supporting evidence. The characters of predicted genes of *O. brachyantha* are similar with gene predictions for rice or other monocot genomes (Supplementary

Table S16).

**Evaluation of completeness and accuracy of the gene sets.** To evaluate the comprehensiveness of the gene prediction efforts, we collected a set of RNA-seq transcripts that were assembled with SOAPdenovo<sup>74</sup>, which did not rely on the reference genome. We selected only those transcripts that have  $\leq 30\%$  transposable element-related sequences,  $\geq 500$  bp in length and code a protein product  $\geq 100$  amino acids. The resulting 13,150 transcripts were used as a standard set of protein-coding genes in *O. brachyantha*. These transcripts were then aligned to the genome sequence by BLAT<sup>80</sup> with an identity  $\geq 95\%$ . Approximately 12,282 transcripts were properly aligned to the genome, which suggests 93% (12,282/13,150) of the protein-coding gene sequences of *O. brachyantha* are covered in the assembled genome. Among the aligned transcripts, nearly 91% (11,206/12,282) are overlapped with the predicted gene models (i.e.  $\geq 95\%$  identity and  $\geq 30\%$  coverage). We found approximately half (579/1,076) of the unaligned transcripts have no homologs upon BLAST search against plant protein database (E-value  $\leq 10^{-5}$ ). This suggests that the gene coverage might be underestimated due to false positives in the assembled RNA-seq transcripts.

We also compared the gene prediction with the gene models of three published BAC sequences, which were annotated with manual inspection (Supplementary Table S17). Of the 51 gene models, 32 genes were perfectly matched with the predicted gene models in this study. Ten genes have sequencing gaps in the coding sequences, which caused smaller gene sizes compared with the gene sizes in the BAC sequences. However, almost all of these gap-containing genes (9/10) covered more than 1/3 of the coding sequences.

In a collection of studies of 141 rice genes (Supplementary Table S18), we were able to find clear orthologs for 132 of them by reciprocal BLAST (E-value  $\leq 10^{-5}$  and further confirmed by analysis the orthologous sequence regions). The nine genes without clear orthologs were further analyzed by comparisons of orthologous sequences between rice and *O. brachyantha*. Five genes do not exhibit any homologs in the orthologous regions of *O. brachyantha* because of too large sequence gap in the coding sequences. No homologous sequences were found in the orthologous region of gene *LOC\_Os03g42900*. However, the orthologous genes of *LOC\_Os03g42900* are detected in maize and sorghum. This suggested that the gene *LOC\_Os03g42900* was deleted from *O. brachyantha* or entirely missed by the current assembly. The orthologous gene of *LOC\_Os01g11940* is well conserved, but was not found by automatic script. The other two genes, *LOC\_Os01g44220* and *LOC\_Os03g29380*, were the result of incorrect prediction either in *O. brachyantha* or in rice (Supplementary Table S19). In total, approximately 5% (7/141) of the functional genes may have not been covered in the genome sequence, which is consistent with previous evaluation using RNA-seq transcripts.

As shown above, the sequence gaps in the gene regions may cause a partial or incorrectly predicted gene model. We evaluated the influence of the sequence gaps on all of the predicted gene models. Approximately 2,177 genes were found to have coding sequence gaps (with a mean gap length of 243 bp). We randomly selected 100 genes to check the quality of gene prediction on these gap genes (50 genes  $\leq 100$  bp gap and 50 genes  $\geq 100$  bp gap). For 85 cases, the gap-containing genes are homologous to rice genes, of which 17 genes cover less than 30% length of the homologous genes due to sequence gaps or frameshift in coding sequences. Seven genes are specific to *O. brachyantha*, and only

*Ob04g15920.1* has a homolog in other plant genomes but not in the rice genome. These gene models may have been due to false positive predictions. Eight genes had an incorrect gene model caused by sequence gaps. In the selected set, approximately 26% (17+1+8) of the gap genes were shown to have a large impact on gene structure. Of the 1,993 genes with single sequence gaps in the coding sequence, we found that approximately 30% of genes were unable to cover  $\geq 30\%$  of the homologous genes, which means that approximately 720 ( $2,177 \times 30\%$ ) genes are not covered or are presented as gene fragments due to sequence gaps in the genome (i.e. 2% of all the genes of *O. brachyantha*).

## Transposable element annotation

**LTR retrotransposons.** First, the genome sequence was masked by the centromeric tandem repeats CentO-F<sup>64</sup> and retrotransposons<sup>81</sup> in *O. brachyantha* using the RepeatMasker program (<http://www.repeatmasker.org>). Then the masked sequence was screened by the LTR-Finder program<sup>82</sup> using default parameters with 2 exceptions in that we set 50 bp minimum LTR length and 100 bp minimum distance between the LTRs. All of the output was manually checked to determine the exact boundaries of the characterized LTR retrotransposons and to filter out the incorrect predicted sequences. In addition, the internal sequences of all of the LTR retrotransposons detected by the LTR-Finder were used as queries to search against GenBank and the Rice genome annotation project database (<http://rice.plantbiology.msu.edu>) in order to group these LTR retrotransposons into different families.

**Non-LTR retrotransposons.** To identify long interspersed nuclear elements (LINEs), the conserved reverse transcriptase domain of the LINEs superfamily<sup>83</sup> was screened for the *O. brachyantha* genome. Ten kilo base (kb) flanking sequences (5-kb on each side) for each hit were extracted and manually examined for polyA/polyT tails and TSDs. Short interspersed nuclear elements (SINEs) were annotated by polyA or polyT tails and TSDs. Additionally, the rice and maize LINEs and SINEs deposited in the GIRI (<http://www.girinst.org>) were used as queries to search against the *O. brachyantha* genome to find their homologs in the genome.

**DNA transposons.** In order to characterize *Mutator*-like elements (MULEs), the *mudrA* conserved domain<sup>84</sup> was used as a query to search against the *O. brachyantha* genome. Twenty kilo base (kb) flanking sequences (10 kb on each side) for each hit were aligned to determine terminal inverted repeats (TIRs) and TSDs. The autonomous MULEs database in *Nipponbare* (Dr Dongying Gao, unpublished) was also utilized to discover homologous MULEs in *O. brachyantha*. All of the MULEs detected by these two methods were combined and used to identify nonautonomous MULEs in the *O. brachyantha* genome. The hAT transposons were detected by hAT family dimerisation domain (pfam05699) and their exact boundaries were determined based on TIRs and 8-bp TSDs. The CACTA transposase conserved domain (pfam02992) was used to conduct tblastn searches and the boundaries of CACTA transposons were determined by the CMCWR terminal motif and 2-3 bp TSDs. Transposons belonging to PIF/*Harbinger* superfamily were annotated based on conserved domain of PIF-like TPases<sup>85</sup> and 3-bp TSD (TWA). Tc1/*mariner* like elements were identified by the transposase sequence<sup>86</sup> and the boundaries were decided by TIRs and 2-bp TSD (TA). Helitron elements were identified based on 5'TC-CTAG3' and the hairpin loop features using the *Helitron* Finder program<sup>87</sup>. The rice transposon library of Dr. Ning Jiang (unpublished data) also was used as a reference for the identification of DNA transposons in *O. brachyantha*.



### **Influence of sequence assembly on transposable element annotation and genome size evolution.**

Using the validation dataset, we estimated that the proportion of DNA transposons in euchromatin (EU) and heterochromatin (HE) are similar (22% EU vs. 22% HE). However, the proportion of RNA repeat elements in heterochromatin was much higher (6% EU vs. 45% HE). By comparing the validation dataset with the genome assembly, we found 3.2% and 16.7% of DNA transposons were missed in transposable element annotation in euchromatin and heterochromatin, respectively. The miss-annotation rate is higher for RNA repeat elements (6.5% in EU and 33.9% in HE).

We assume that the estimated genome size of *O. brachyantha* is 300 Mb. We used two schemes to evaluate how many repeat sequences were possibly miss-annotated in the current assembly. In the first scheme, we regard the pericentromeric regions (~2 Mb in the centromeric regions) of *O. brachyantha* as heterochromatic based on cytogenetic observations. The miss-annotated DNA transposons in euchromatin are estimated to be ~ 1.94 Mb ( $276 \text{ Mb} * 0.22 * 0.032 = 1.94 \text{ Mb}$ ), heterochromatin ~ 0.88 Mb ( $24 \text{ Mb} * 0.22 * 0.167 = 0.88 \text{ Mb}$ ). The miss-annotated RNA repeat elements in euchromatin are estimated to be ~ 1.1 Mb ( $276 \text{ Mb} * 0.06 * 0.065 = 1.1 \text{ Mb}$ ), heterochromatin ~ 3.7 Mb ( $24 \text{ Mb} * 0.45 * 0.34 = 3.7 \text{ Mb}$ ). In total, we miss-annotate 4.74-Mb of repeat elements in this scheme. In the second scheme, we assume the proportion of heterochromatin in *O. brachyantha* was the same as in rice (15%). In this scheme, the miss-annotated transposable elements are ~ 11.3 Mb, including ~ 3.44 Mb DNA transposons and ~ 7.9 Mb RNA repeat elements.

Considering the genome size differences between *O. brachyantha* (262 Mb, including 70 Mb transposable elements) and rice genomes (372 Mb, including 138 Mb transposable elements), the differences of transposable elements were estimate to contribute ~ 56.6 Mb ( $138 - (70 + 11.34) = 56.6$ ) to genome size variation. And LTR retrotransposons alone may contribute 50.4 Mb ( $79.3 - (21 + 7.9) = 50.4$ ) to genome size variation, approximately 45% ( $50.4 / (372 - 262) = 46\%$ ) of the genome size variation. This result is slightly lower but comparable to the estimation in the manuscript (~ 50%).

## **Resistance related gene family**

**Characterize resistance gene families NBS-LRR and RLK-LRR.** Genes for disease resistance comprise the most dynamic gene family in plant genomes<sup>88</sup>. In *O. sativa*, NBS-LRR and RLK-LRR are two major classes of resistance genes involved in defense-related responses<sup>89</sup>. To characterize members of NBS-LRR family, we first searched protein-coding genes with hmmer3<sup>90</sup> using Pfam family NBS (NB-ARC, domain Pfam00931). Candidate genes were filtered and classified into subfamily by presence of specific domains (NBS, nucleotide-binding site; CC, Coiled-coil; TIR, Toll Interleukin Receptor; LRR, Leucine Rich-Repeat). CC domains were detected by ncoils with default parameters<sup>91</sup>. LRR domains were detected by hmmsearch<sup>90</sup> using LRR domains in Smart database<sup>92</sup> (E-value  $\leq 0.1$ ). NBS and TIR domains were detected by hmmsearch<sup>90</sup> using Pfam00931 and Pfam001582 with E-value  $\leq 0.1$ . To characterized members of RLK-LRR gene family, we searched protein-coding gene with hmmer3<sup>90</sup> using kinase domain (Pfam00069) and LRR domains in Smart database<sup>92</sup> (E-value  $\leq 0.1$ ). Classification of subfamilies of RLK-LRRs were based the phylogenetic relationship with subfamilies in *O. sativa*<sup>93</sup>. For both NBS-LRR and RLK-LRR, additional members were retrieved by adding collinear genes that assigned as NBS-LRR or RLK-LRR in one species but missed in another.

**Comparative analysis of resistance gene families NBS-LRR and RLK-LRR.** In total, we

characterized 399 and 657 NBS-LRR genes in *O. brachyantha* and *O. sativa*, respectively (Supplementary Table S5). Ninety percent (363) of the NBS-LRR genes in *O. brachyantha* are located in orthologous positions compared to *O. sativa*, of which 196 are present as tandem duplications in *O. brachyantha*, compared to 345 in *O. sativa* (Supplementary Table S5 and Supplementary Fig. S7). Eleven and four pseudogenes were identified by comparison of the orthologous gene structures in *O. brachyantha* and *O. sativa*, respectively (Supplementary Table S6). Transposable element insertions were found to be involved in the pseudogenization of 7 and 2 genes in *O. brachyantha* and *O. sativa*, resulting in the absence of functional resistance genes in these loci (Supplementary Table S6 and Supplementary Fig. S8). In addition, 156 NBS-LRR genes were found to be present in non-collinear positions in *O. sativa*, thus contributing to the expansion of NBS-LRR gene family in *O. sativa* (Supplementary Table S5 and Supplementary Fig. S7). The RLK-LRR gene family is highly conserved between the *O. brachyantha* and *O. sativa*. Only the LRR-I, LRR-XII and LRR-Xb subfamilies were amplified in *O. sativa* (Supplementary Table S7). The LRR-XII subfamily have 30 genes amplified by tandem duplication and another 24 genes transposed to non-collinear positions (Supplementary Table S7 and Supplementary Fig. S9). Most of the pseudogenes of RLK-LRR are members of LRR-XII, demonstrating the dynamic evolution of this subfamily in the plant immune system (Supplementary Table S8 and Supplementary Fig. S10).

## RNA-seq transcriptome

Shoots and roots were harvested from seedlings of *O. brachyantha* (IRGC101232) two weeks after germination. Total RNA was extracted using Trizol reagent (Invitrogen) with further purification. We then used Dynabeads with Oligo(dT) (Invitrogen) to enrich mRNA from the purified total RNA. The mRNAs were fragmented into 200-700 nts and used to synthesized cDNA with random hexamer primers. The products were purified with a QIAquick PCR Purification Kit (QIAGEN) and 200-250 bp fragments were used to construct the sequencing library using the mRNA-seq sample prep kit (Illumina). The sequencing was performed with an Illumina Genome Analyzer (75 bp PE). In total, we produced 30.5 million reads (16 million for roots and 14.5 million for shoots). The reads were aligned with the genome using Tophat<sup>94</sup>, which can align junction reads to the exon-intron boundary. By allowing 2 mismatches per set of reads, approximately 26 million reads (88%) were uniquely mapped to the genome, in which 19 million reads (63%) with matching pairs were properly mapped. Only 1.7 million (5%) mapped reads with matching pair were unmapped. The short reads were assembled into transcripts by Cufflink<sup>95</sup> (92,349 transcripts with an N50 size of 1,022 bp), as well as SOAPdenovo<sup>74</sup> (113,340 transcripts with an N50 size of 447 bp).

## Supplementary References

61. Zou, X.H. et al. Analysis of 142 genes resolves the rapid diversification of the rice genus. *Genome Biol* **9**, R49 (2008).
62. Tang, L. et al. Phylogeny and biogeography of the rice tribe (Oryzeae): evidence from combined analysis of 20 chloroplast fragments. *Mol Phylogenet Evol* **54**, 266-77 (2010).
63. Kim, H. et al. Construction, alignment and analysis of twelve framework physical maps that represent the ten genome types of the genus *Oryza*. *Genome Biol* **9**, R45 (2008).
64. Lee, H.R. et al. Chromatin immunoprecipitation cloning reveals rapid evolutionary patterns of centromeric DNA in *Oryza* species. *Proc Natl Acad Sci U S A* **102**, 11793-8 (2005).
65. Cheng, Z., Buell, C.R., Wing, R.A., Gu, M. & Jiang, J. Toward a cytological characterization of the rice genome. *Genome Res* **11**, 2133-41 (2001).
66. Guo, Y.L. & Ge, S. Molecular phylogeny of Oryzeae (Poaceae) based on DNA sequences from chloroplast, mitochondrial, and nuclear genomes. *Am J Bot* **92**, 1548-58 (2005).
67. Lu, F. et al. Comparative sequence analysis of MONOCULM1-orthologous regions in 14 *Oryza* genomes. *Proc Natl Acad Sci U S A* **106**, 2071-6 (2009).
68. Ali, M., Sanchez, P., Yu, S.B., Lorieux, M. & Eizenga, G. Chromosome Segment Substitution Lines: A Powerful Tool for the Introgression of Valuable Genes from *Oryza* Wild Species into Cultivated Rice (*O. sativa*). *Rice* **3**, 218-234 (2010).
69. Uozu, S. et al. Repetitive sequences: cause for variation in genome size and chromosome morphology in the genus *Oryza*. *Plant Mol Biol* **35**, 791-9 (1997).
70. Ammiraju, J.S. et al. The *Oryza* bacterial artificial chromosome library resource: construction and analysis of 12 deep-coverage large-insert BAC libraries that represent the 10 genome types of the genus *Oryza*. *Genome Res* **16**, 140-7 (2006).
71. Huang, S. et al. The genome of the cucumber, *Cucumis sativus* L. *Nat Genet* **41**, 1275-81 (2009).
72. Chen, M. et al. An integrated physical and genetic map of the rice genome. *Plant Cell* **14**, 537-45 (2002).
73. Wing, R.A. et al. The *Oryza* map alignment project: the golden path to unlocking the genetic potential of wild rice species. *Plant Mol Biol* **59**, 53-62 (2005).
74. Li, R. et al. De novo assembly of human genomes with massively parallel short read sequencing. *Genome Res* **20**, 265-72 (2009).
75. Nelson, W. & Soderlund, C. Integrating sequence with FPC fingerprint maps. *Nucleic Acids Res* **37**, e36 (2009).
76. Jacquemin, J. et al. Long-range and targeted ectopic recombination between the two homeologous chromosomes 11 and 12 in *Oryza* species. *Mol Biol Evol* **28**, 3139-50 (2011).
77. Tang, H. et al. Synteny and collinearity in plant genomes. *Science* **320**, 486-8 (2008).
78. Liang, C., Mao, L., Ware, D. & Stein, L. Evidence-based gene predictions in plant genomes. *Genome Res* **19**, 1912-23 (2009).
79. Slater, G.S. & Birney, E. Automated generation of heuristics for biological sequence

- comparison. *BMC Bioinformatics* **6**, 31 (2005).
80. Kent, W.J. BLAT--the BLAST-like alignment tool. *Genome Res* **12**, 656-64 (2002).
  81. Gao, D. et al. A lineage-specific centromere retrotransposon in *Oryza brachyantha*. *Plant J* **60**, 820-31 (2009).
  82. Xu, Z. & Wang, H. LTR\_FINDER: an efficient tool for the prediction of full-length LTR retrotransposons. *Nucleic Acids Res* **35**, W265-8 (2007).
  83. Xiong, Y. & Eickbush, T.H. Origin and evolution of retroelements based upon their reverse transcriptase sequences. *Embo J* **9**, 3353-62 (1990).
  84. Lisch, D.R., Freeling, M., Langham, R.J. & Choy, M.Y. Mutator transposase is widespread in the grasses. *Plant Physiol* **125**, 1293-303 (2001).
  85. Zhang, X., Jiang, N., Feschotte, C. & Wessler, S.R. PIF- and Pong-like transposable elements: distribution, evolution and relationship with Tourist-like miniature inverted-repeat transposable elements. *Genetics* **166**, 971-86 (2004).
  86. Yang, G., Nagel, D.H., Feschotte, C., Hancock, C.N. & Wessler, S.R. Tuned for transposition: molecular determinants underlying the hyperactivity of a Stowaway MITE. *Science* **325**, 1391-4 (2009).
  87. Du, C., Caronna, J., He, L. & Dooner, H.K. Computational prediction and molecular confirmation of Helitron transposons in the maize genome. *BMC Genomics* **9**, 51 (2008).
  88. Meyers, B.C., Kaushik, S. & Nandety, R.S. Evolving disease resistance genes. *Curr Opin Plant Biol* **8**, 129-34 (2005).
  89. Chen, X. & Ronald, P.C. Innate immunity in rice. *Trends Plant Sci* **16**, 451-9 (2011).
  90. Eddy, S.R. A new generation of homology search tools based on probabilistic inference. *Genome Inform* **23**, 205-11 (2009).
  91. Lupas, A., Van Dyke, M. & Stock, J. Predicting coiled coils from protein sequences. *Science* **252**, 1162-4 (1991).
  92. Letunic, I., Doerks, T. & Bork, P. SMART 6: recent updates and new developments. *Nucleic Acids Res* **37**, D229-32 (2009).
  93. Shiu, S.H. et al. Comparative analysis of the receptor-like kinase family in *Arabidopsis* and rice. *Plant Cell* **16**, 1220-34 (2004).
  94. Trapnell, C., Pachter, L. & Salzberg, S.L. TopHat: discovering splice junctions with RNA-Seq. *Bioinformatics* **25**, 1105-11 (2009).
  95. Trapnell, C. et al. Transcript assembly and quantification by RNA-Seq reveals unannotated transcripts and isoform switching during cell differentiation. *Nat Biotechnol* **28**, 511-5 (2010).
